# 1 Title

2 Major effect loci for plant size before onset of nitrogen fixation allow accurate prediction of  
3 yield in white clover

# 5 Authors

6 Sara Moeskjær<sup>1\*</sup> & Cathrine Kiel Skovbjerg<sup>1\*</sup>, Marni Tausen<sup>2,4</sup>, Rune Wind<sup>1</sup>, Niels  
7 Roulund<sup>3</sup>, Luc Janss<sup>4</sup>, and Stig U. Andersen<sup>1</sup>

8  
9 \*:These authors contributed equally to the work

10

11

## 12 **Author affiliations:**

13 <sup>1</sup>Department of Molecular Biology and Genetics, Aarhus University, 8000 Aarhus C, Denmark

14 <sup>2</sup>Bioinformatics Research Centre, Aarhus University, 8000 Aarhus C, Denmark

15 <sup>3</sup>DLF, 4660 Store Heddinge, Denmark

16 <sup>4</sup>Center for Quantitative Genetics and Genomics, Aarhus University, 8000 Aarhus C, Denmark

17

18

## 19 **Authors for correspondence:**

20 Stig U. Andersen, [sua@mbg.au.dk](mailto:sua@mbg.au.dk)

21 Cathrine Kiel Skovbjerg [cks@mbg.au.dk](mailto:cks@mbg.au.dk)

22

## 23 **Keywords:**

24 *Trifolium repens*, nitrogen fixation, yield, GWAS, genomic prediction, genomic selection,  
25 genetics, sustainable agriculture, symbiosis

## 26 Abstract

27 White clover is an agriculturally important forage legume grown throughout temperate  
28 regions as a mixed clover-grass crop. It is typically cultivated with low nitrogen input,  
29 making yield dependent on nitrogen fixation by rhizobia in root nodules. Here, we investigate  
30 the effects of clover and rhizobium genetic variation by monitoring plant growth and  
31 quantifying dry matter yield of 704 combinations of 145 clover and 169 rhizobium  
32 genotypes. We find no significant effect of rhizobium variation. In contrast, we can predict  
33 yield based on a few white clover markers strongly associated with plant size prior to  
34 nitrogen fixation, and the prediction accuracy for polycross offspring yield is remarkably  
35 high. Several of the markers are located near a homolog of *Arabidopsis thaliana* *GIGANTUS*  
36 *1*, which regulates growth rate and biomass accumulation. Our work provides fundamental  
37 insight into the genetics of white clover yield and identifies specific candidate genes as  
38 breeding targets.

## 39 Introduction

40 White clover (*Trifolium repens* L.) is an important forage crop in temperate climates. It  
41 improves forage quality by increasing protein content, digestibility and palatability in  
42 perennial grass pastures and allows reduced nitrogen fertilizer input due to symbiotic nitrogen  
43 fixation with rhizobia (Archer, 1973; Ruz-Jerez et al., 1991; Thomson et al., 1985). It is a  
44 relatively young, outcrossing species, which originated during the most recent glaciation  
45 around 20,000 years ago by hybridisation of two diploid species, *T. occidentale* and *T.*  
46 *pallescens* (**Figure 1A**) (Griffiths et al., 2019).

47 In grass-clover pastures, three main components and the interaction between them determine  
48 yield: clover, grass and rhizobia. Under low nitrogen input, yield can improve many-fold if  
49 legumes are inoculated with the appropriate symbiont, supporting sustainable agricultural  
50 systems to feed livestock (Caradus et al., 1995). Since the 1970s, a large number of studies  
51 have investigated the interactions between white clover and rhizobium. Many examples of  
52 successful inoculation have been reported in locations where the natural occurrence of  
53 *Rhizobium leguminosarum* sv. *trifolii* white clover symbionts is low (Irisarri et al., 2019;  
54 Lowther & Kerr, 2011; M. M. Svenning et al., 2001; Young & Mytton, 1983), and a number  
55 of examples of white clover-rhizobium interactions that affect yield exist (Mytton, 1975;  
56 Mette M. Svenning et al., 1991; Young & Mytton, 1983), although other studies reported  
57 only small effects or no such interactions (Crush, 1995).

58 A major objective of white clover breeding is to improve the biomass yield and thus reduce  
59 the land use required for supporting meat and dairy production (Hayes et al., 2013), but the  
60 genetic gain for dry matter yield in clover has increased at a moderate to low rate in the last  
61 90 years (Hoyos-Villegas et al., 2019). Currently, white clover is primarily bred using  
62 phenotypic selection, which might be confounded by large effects of phenotypic plasticity,  
63 limiting accurate estimates of breeding values, and requires relatively long generation  
64 intervals as the breeder has to wait for traits to become observable (Hayes et al., 2013;  
65 Hoyos-Villegas et al., 2019). Although several studies have reported successful prediction of  
66 complex traits when applying genomic selection (GS) to important crops (Voss-Fels et al.,  
67 2019), the application of genetic markers in breeding of white clover has been very limited,  
68 probably because of its complex genetic nature (Faville et al., 2012). However, with the  
69 emergence of a high quality reference genome with extensive gene annotation (Griffiths et  
70 al., 2019), applying genomics in the breeding practices of white clover has become more

71 attractive, especially considering that GS has shown promising results for biomass yield in  
72 alfalfa, an autotetraploid forage legume (Paolo Annicchiarico et al., 2015).  
73 Identification of quantitative trait loci (QTLs) can help accelerate the yield improvement of  
74 future cultivars. During the last decades efforts have been made to identify QTLs associated  
75 with yield in important crops (Bernardo, 2008). Examples of these studies include the  
76 identification of QTLs that explain between 5% and 45% of the variation in plant biomass  
77 yield in rye, sweet potato, rice and alfalfa using family-based linkage studies or genome-wide  
78 association studies (GWAS) (Matsubara et al., 2016; Miedaner et al., 2018; Sakiroglu &  
79 Brummer, 2017; Zhao et al., 2013).  
80 Most traits associated with agronomically important traits such as yield are controlled by  
81 many loci each contributing small effects (Bernardo, 2008). For such complex traits marker  
82 assisted selection (MAS) based on a few loci is not expected to significantly increase genetic  
83 gain. A newer alternative to MAS is GS (Meuwissen et al., 2001). GS uses all molecular  
84 markers distributed across the genome in a regression model to calculate genomic estimated  
85 breeding values (GEBVs) of individuals without any prior knowledge of where causal genes  
86 are located (Meuwissen et al., 2001). A popular method of implementing genomic prediction  
87 (GP) is the genomic best linear unbiased predictor (GBLUP) that utilizes genomic  
88 relationships between individuals for prediction. An assumption for the GBLUP model is  
89 equal variance for all markers, which is very seldom the case even for complex traits  
90 (VanRaden, 2008). Alternatively, identified QTLs can be used to reduce the number of  
91 markers expected to influence a trait by combining the GWAS top significant SNPs with a  
92 genomic prediction method that allows markers to have different effect sizes. The self-trained  
93 and fast nature of machine learning algorithms make them excellent alternatives to traditional  
94 genomic prediction methods. Among the most popular machine learning algorithms is  
95 random forest (RF), which uses ensemble learning methods of individual decision trees to  
96 make an accurate prediction model (Breiman, 2001).  
97 Previous studies have shown that 80-200 GWAS selected markers can predict yield in wheat  
98 with an accuracy similar to GP models based on all available marker data (Cericola et al.,  
99 2017). However, only few studies have used GWAS to identify QTLs in white clover and  
100 none of these examined biomass yield, the genetics of which remains poorly understood  
101 (Inostroza et al., 2018; Kaur et al., 2017).  
102 In this study, we examine binary interactions of rhizobium strains and clover genotypes by  
103 continuously monitoring plant growth and quantifying dry matter yield. We use these results

104 to assess the relative contributions of clover and rhizobium genetic variation to yield, identify  
105 yield-related QTLs and predict yield within and across generations.

106

## 107 Results

### 108 145 diverse white clover genotypes derived from commercial 109 cultivars

110 We carried out RNA-sequencing of roots for a panel of 145 white clover genotypes derived  
111 from 20 commercial cultivars and identified 383,280 high quality SNPs that were used for all  
112 downstream analyses. The genetic structure of the white clover population was assessed  
113 using a genomic relationship matrix (**Figure 1B**). In general, the genotypes clustered by  
114 cultivar and showed low levels of relatedness. Genotypes from different cultivars had  
115 relationship coefficients close to 0. In line with these results, principal component analysis  
116 indicated that the clover genotypes clustered mostly by variety (**Figure 1C**). We found a  
117 rapid decline in LD after 1 kb (**Figure 1D**) and high levels of heterozygosity with an average  
118 of 0.28 (**Figure 1E**), consistent with obligate outcrossing.

### 119 Initial plant size is strongly correlated with yield

120 To evaluate the relative contributions of clover and rhizobium genetic variation to white  
121 clover yield, we combined the 145 clover genotypes with 169 previously described  
122 *Rhizobium leguminosarum* sv. *trifolii* strains representing genospecies A, B, and C (Cavassim  
123 et al., 2020). We tested 704 clover-rhizobium combinations in a greenhouse setting,  
124 continuously monitoring plant growth using a high-throughput imaging system (Tausen et al.,  
125 2020) (**Figure 2A-C**). Using stolon cuttings to generate clones of single plants, we included  
126 an average of 15.9 replicates of each white clover genotype in combination with 4-6 different  
127 rhizobium strains or a mix of multiple strains, which yielded 13.6 replicates of each  
128 rhizobium strain and a total dataset of 2,304 observations. The experiment was structured into  
129 two different rounds of a randomised trial design. Each round consisted of two sets where  
130 each set refers to a full set of 704 unique clover and rhizobium combinations, each grown in  
131 2-3 replicates per round. The 19 non-inoculated controls showed pale yellow leaves,

132 indicative of nitrogen starvation, and very poor growth, showing that the experimental setup  
133 efficiently prevented spread of rhizobia between pots.  
134 We recorded dry matter yield as an end-point measurement and calculated the average  
135 growth per day (gpd) as the dry matter increase per day from inoculation to harvest (**Figure**  
136 **2E**). Based on the image data, we quantified the initial plant size prior to onset of nitrogen  
137 fixation (iSize) and growth rate during nitrogen fixation (gpi) (**Figure 2D+2F**,  
138 **Supplementary file 1**). iSize was calculated as the average plant size during the first 10 days  
139 post inoculation, whereas gpi represented the average growth rate from day 11 to 25 post  
140 inoculation (**Figure 3A**). Observations of iSize, gpd and gpi were approximately normally  
141 distributed for most combinations of rounds and sets. However, this was not the case for gpd  
142 observations from round 1 set 2, where plants had been inoculated on different days and  
143 greenhouse temperatures had been unusually high (**Figure 2D-F**).  
144 Individual plants of the same genotype showed large variation in both iSize and their overall  
145 growth (**Figure 3A**). Based on all 2304 observations, we found that iSize was strongly  
146 correlated with gpd (**Figure 3B**, **Supplementary file 2**). Likewise, iSize and gpi were also  
147 significantly correlated, although they represent non-overlapping growth stages (**Figure 3B**,  
148 **Supplementary file 2**). This suggested that variation in plant size prior to symbiosis  
149 establishment, iSize, had a large impact on the entire growth period. To correct for this  
150 variation, and get independent representations of growth stages prior to and during nitrogen  
151 fixation, we subtracted the effect of iSize from gpd and gpi, to obtain the traits gpdCor and  
152 gpiCor, respectively.

## 153 Rhizobium variation does not significantly affect yield

154 Based on the full set of data, which included 3-4 four replicates of each clover-rhizobium  
155 combination, we estimated the variance explained by clover, rhizobium and clover x  
156 rhizobium interaction for gpd, gpdCor, gpi, gpiCor and iSize. For all traits, we found that  
157 clover explained more of the yield variance than rhizobium. The rhizobium contribution was  
158 not significant for any of the traits, as the highest posterior density interval (HDPI) included  
159 zero (**Figure 3C**, **Supplementary table 1**). Although significant for gpd and gpdCor, the  
160 clover x rhizobium interaction explained a very small part of the variation (**Figure 3C**,  
161 **Supplementary table 1**). The proportion of variance explained by clover was smallest for  
162 iSize (**Figure 3C**, **Supplementary table 1**), which is consistent with considerable stochastic  
163 variation in cutting size (**Figure 3A**). On the other hand, correcting for iSize led to a

164 decreased proportion of variance explained by clover for both *gpd* and *gpi*, suggesting that  
165 *iSize* includes a genetic component relevant for yield. Based on this broad-sense heritability  
166 analysis, we chose to focus exclusively on the clover contribution for the remaining analyses  
167 and averaged the data by clover genotype to obtain 145 observations of each trait  
168 (**Supplementary file 3**).

169

## 170 Yield and initial plant size show high narrow sense heritabilities

171 Using the averaged data, we then estimated narrow sense heritabilities for all traits using a  
172 GRM based on the 383,280 RNA-seq SNPs (**Supplementary file 4**). In contrast to its low  
173 broad sense heritability at the single plant level, *iSize* showed a high narrow sense heritability  
174 of 0.83 for the data averaged by clover genotype (**Figure 3D**). This indicates that stochastic  
175 variation in cutting size is efficiently controlled for by averaging across a large number of  
176 replicates, clearly revealing a large genetic component captured by the genotyped SNPs. *Gpd*  
177 showed the second highest SNP heritability, whereas the remaining yield traits, *gpdCor*, *gpi*  
178 and *gpiCor*, which describe the second part of the growth phase, showed lower narrow-sense  
179 heritabilities (**Figure 3D**).

180 The high narrow sense heritabilities for *iSize* and *gpd* were encouraging for genomic  
181 prediction, and we applied GBLUP prediction models to all traits using 6-fold cross-  
182 validation repeated 100 times. We observed moderate to high prediction accuracies for *gpd*  
183 (0.39) and *iSize* (0.53) (**Figure 4A**). Further, the model was able to predict *gpi* with a low  
184 accuracy of 0.16 (**Figure 4A**). However, we were unable to predict the traits where *iSize*  
185 effects were eliminated, *gpdCor* and *gpiCor*, from genetic data (**Figure 4A**).

186 To test more thoroughly if later growth stages could contribute genetic information relevant  
187 to yield, we predicted *gpd* by combining *iSize* GEBVs with *gpdCor*, *gpi* or *gpiCor* GEBVs.  
188 We found that *gpdCor* GEBVs could not explain a significant part of the *gpd* phenotypic  
189 variance, whereas *gpi* and *gpiCor* GEBVs could explain a significant part of *gpd* variance  
190 only when *iSize* GEBVs were not included in the model (**Supplementary table 2**). Based on  
191 these results, we focused on the *iSize* and *gpd* traits for the remaining analyses.

192

## 193 Yield can be predicted based on the genetics of initial plant size

194 To further investigate the relationship between the traits, we calculated Pearson correlation  
195 coefficients for all possible combinations of observed phenotypes and estimated GEBVs  
196 (**Figure 4B**). Surprisingly, we observed that *gpd* showed a higher correlation with *iSize*

197 GEBVs (0.38) than with its own gpd GEBVs (0.33). Furthermore, we found the correlation of  
198 GEBVs of gpd and iSize to be 0.93, indicating that the two traits show a very high degree of  
199 genetic correlation that exceeds the phenotypic correlation of 0.75 (**Figure 4B**). These  
200 observations indicate that it is possible to predict gpd from iSize, i.e. to predict dry matter  
201 accumulation for the entire growth period based on GEBVs obtained exclusively from data  
202 describing the initial growth phase prior to onset of nitrogen fixation.

203 Since iSize could be a comparatively simple trait, if for instance related mainly to leaf size,  
204 we carried out GWAS to identify specific markers associated with iSize and/or gpd. In line  
205 with the high level of genetic correlation, we observed overlapping genetic signals associated  
206 with gpd and iSize on chromosomes 3 and 7 (**Figure 5A-D, Supplementary figure 1,**  
207 **Supplementary file 5**). In addition, we found a strong signal approaching the Bonferroni-  
208 threshold on chromosome 13 and a peak on chromosome 1, which was exclusively associated  
209 with iSize. In general, the gpd associations were weaker than those of iSize, but we found a  
210 gpd signal on chromosome 8 that was not identified for iSize (**Figure 5A-D, Supplementary**  
211 **figure 1**).

212 Motivated by what appeared to be clear GWAS signals, although they did not reach genome-  
213 wide significance, we set up a two-step prediction approach. First, we conducted a GWAS  
214 using a training population to select the top 25 or 200 most significant markers. Second, we  
215 used a random forest (RF) approach to predict gpd or iSize in a testing population based on  
216 the GWAS markers. GWAS was carried out for 600 different training populations, resulting  
217 in 949 unique SNPs in top 25 for iSize and 1196 for gpd. When considering only SNPs that  
218 occurred in at least 10% of the GWAS runs, the numbers were reduced to 43 and 47 for iSize  
219 and gpd, respectively. We predicted iSize and gpd based on both iSize and gpd GWAS  
220 markers. All GWAS-based predictions were compared to predictions using 25 or 200 random  
221 SNPs. The predictions based on the top GWAS SNPs were significantly more accurate than  
222 those based on random sets of markers in all cases (**Figure 5E+F**).

223 For iSize, the GWAS+RF method achieved performances close to GBLUP using the full  
224 GRM, but the GBLUP model was significantly better in all cases (**Figure 5A**). For gpd, the  
225 predictive performance was relatively poor when using the top 25 or top 200 gpd GWAS  
226 SNPs for prediction. Especially, using the top 25 gpd SNPs resulted in a large drop in  
227 predictive power, with an average correlation of 0.20 compared to 0.33 using GBLUP. The  
228 iSize-associated markers produced more accurate predictions for gpd, indicating that the iSize  
229 trait more accurately captures the relevant genetics. Predicting gpd from the top 200 iSize



230 GWAS SNPs did not differ significantly from the GBLUP results. However, using the top 25  
231 iSize markers resulted in significantly better accuracy than GBLUP (**Figure 5F**).

232 To evaluate the stability and importance of the genetic regions associated with gpd and iSize,  
233 we coloured markers by the fraction of times they occurred in the top 25 most significant  
234 SNPs in our cross-validation scheme and scaled them by their average importance given by  
235 the RF model (**Figure 5A-D**). The top SNPs contributing the overlapping iSize/gpd peaks on  
236 chromosomes 3 and 7 occurred frequently in top 25, thus providing us with stable and  
237 trustworthy signals for both traits (**Figure 5A-D**). The SNPs in the remaining peaks identified  
238 for iSize also showed high occurrences (**Figure 5A+C**). The SNPs in the peak on  
239 chromosome 8 identified exclusively in the gpd GWAS showed relatively low occurrence,  
240 indicating that they were less likely to be truly associated with gpd (**Figure 5B+D**).

241 Looking further into the prediction of gpd from the top iSize markers and *vice versa* we  
242 found that predicting a trait based on GWAS results from the other correlated trait caused the  
243 genetic regions shared by the two traits to be assigned more importance by the RF model  
244 relative to the peaks specific for one trait (**Figure 5A-D**). Overall, the GWAS and RF  
245 prediction results indicated that relatively few genomic regions contribute large effects to the  
246 traits of interest. The genes located most closely to the markers in the GWAS peaks on  
247 chromosomes 1, 3, 6, 7, 8 and 13 are listed in **Supplementary table 3**. These include a  
248 putative ortholog of *Arabidopsis thaliana* *GIGANTUS1*, which regulates growth and biomass  
249 accumulation (Gachomo et al., 2014).

## 250 F1 poly-cross yield can be predicted with high accuracy

251 The greenhouse experiment was based on stolon cuttings in order to obtain genetically  
252 identical individuals in an outcrossing species. However, white clover is normally grown  
253 from seed. To examine the relevance of our data for seed-grown plants and to evaluate the  
254 ability to predict performance across generations, we set up nine poly-crosses with 4-6  
255 parents chosen among the 145 genotypes tested in the greenhouse (**Figure 6A**,  
256 **Supplementary table 5**). For both iSize and gpd, the parents represented a large diversity in  
257 their GEBVs as predicted by GBLUP (**Supplementary figure 2, Supplementary table 5**).

258 The F1 populations resulting from the polycrosses showed large differences in average yield,  
259 ranging from 2.9 g to 4.6 g of dry matter per F1 individual (**Figure 6B, Supplementary**  
260 **table 5, Supplementary file 6**).

261 To test if we could predict the average yield of the nine F1 populations based on the data  
262 from the parental (F0) generation, we calculated GEBVs for the F0 parents, using the  
263 remaining 139 to 142 F0 clover genotypes as the training population (**Figure 6A**). This  
264 simulates a scenario, where the parents for a synthetic cultivar are genotyped but not  
265 phenotyped, and the average genotype of an offspring population is assumed to be  
266 represented by the average parental GEBV. We found a correlation between the average  
267 parental GEBV and the average dry weight of F1 populations of 0.95 for gpd and 0.94 for  
268 iSize (**Figure 6C-D**). We compared these values to the correlation between F1 average dry  
269 weight and the average F0 phenotype. This represents a phenotypic selection scheme, where  
270 parents are selected directly based on their F0 gpd or iSize phenotype. Phenotypic selection  
271 yielded correlations of 0.92 and 0.78 for gpd and iSize, respectively (**Figure 6E-F**). We  
272 conclude that genomic prediction performed better than or equal to direct phenotypic  
273 selection. In particular, genomic selection outperformed phenotypic selection for iSize,  
274 indicating that it is not initial plant size *per se*, but rather its heritable genetic components that  
275 are important for yield.

276

## 277 Discussion

278 Previous studies on white clover-rhizobium effects on yield relied on a handful of clover and  
279 rhizobium genotypes (Mytton, 1975; Mette M. Svenning et al., 1991; Young & Mytton,  
280 1983), likely because the pairwise testing of many clover-rhizobium combinations requires a  
281 large experimental setup. Here, we examined more than 700 different combinations, but  
282 found no significant contribution to yield from rhizobium and only minor effects of clover-  
283 rhizobium interactions. Since we used diverse rhizobium strains belonging to three distinct  
284 genospecies of *R. leguminosarum* sv. *trifolii*, which were collected from locations in  
285 Denmark, England and France (Cavassim et al., 2020; Moeskjær et al., 2020), we had  
286 initially expected variation in nitrogen fixation efficiency between the strains. All strains  
287 were collected from pink and healthy looking root nodules, suggesting an effective symbiotic  
288 interaction. In our setup, this generalised to efficient interactions with all tested clover  
289 genotypes, although they too represent considerable genetic variation across twenty different  
290 commercial cultivars. Our results suggest that white clover is efficient in sanctioning rhizobia  
291 that do not provide high levels of fixed nitrogen and that a large degree of cross-compatibility  
292 exists for European white clover and *R. leguminosarum* sv. *trifolii* genotypes. This does not

293 rule out that different clover genotypes would preferentially select specific rhizobium strains  
294 or that strong clover-rhizobium interaction effects exist outside of our population samples, as  
295 reported by others (Irisarri et al., 2019). Indeed, if we had also isolated rhizobium strains  
296 from small and inefficient-looking nodules, we may well have identified such effects. Seen  
297 from an inoculation perspective, our results indicate that efficient rhizobia are present and  
298 selected by white clover at all sampled locations, and our isolated strains represent a  
299 genetically well-characterised source of potential new white clover inoculants for locations  
300 with limited rhizobium populations.

301 We used stolon cuttings to achieve genetic replication in an outbreeding species. Because of  
302 the insignificant contributions from rhizobium, we effectively had more than ten replicates of  
303 each clover genotype. This helped reduce the effects of variation in cutting size and allowed  
304 us more accurate phenotype estimates for each clover genotype. For F0 predictions, reducing  
305 the number of replicates quickly leads to deterioration of prediction accuracy, whereas F1  
306 polycross predictions retain high accuracy even with as little as two replicates

307 (**Supplementary figure 3**). Because the polycrosses have 4-6 parents, however, two  
308 replicates in the F1 predictions correspond to averaging across at least eight data points. The  
309 prediction of polycross yield is therefore intrinsically more robust to limited replication of  
310 individual genotypes. Still, accurate predictions of the breeding values of potential parents is  
311 required for ensuring maximum genetic gain, and here increasing the number of replicates,  
312 even to more than 10, appears to result in increased accuracy (**Supplementary figure 3**).

313 Clonal propagation is used in many major food crops including nearly all types of fruit and  
314 important roots and tubers, making it highly relevant to consider the effect of the number of  
315 replicates on prediction accuracy (Bradshaw, 2016; Grüneberg et al., 2009). It is worth noting  
316 that the stolon-based greenhouse experiments were carried out in two rounds, which differed  
317 both with respect to growth medium (sterilized peat or vermiculite) and time of year (spring  
318 or summer). Because of this large variation in environmental conditions, we consider it likely  
319 that the genetic associations discovered using the complete data set are generally important  
320 for white clover yield potential. The fact that yield from seed-grown F1 plants cultivated the  
321 following year in a different greenhouse could be predicted with high accuracy based on the  
322 stolon cutting data supports this hypothesis.

323 We find it striking that we could predict yield most accurately based on the genetics  
324 underlying initial plant size from day 1-10 post inoculation, and that data from the remaining  
325 growth period, even the dry matter yield data itself, did not contribute additional relevant  
326 genetic information. Others have reported genetic correlations between growth at different

327 stages and biomass yield in rye, but the relative predictive power of the different observation  
328 was not investigated in detail (Miedaner et al. 2018). The image data was critical for  
329 understanding the characteristics and limiting factors for yield, because it enabled us to  
330 examine distinct growth stages separately. Under our experimental conditions, the clover  
331 yield potential was already manifest in the size of the stolon cuttings from fully nitrogen-  
332 fertilized mother plants, indicating that variation in nitrogen fixation efficiency in later  
333 growth stages did not impact yield. This is consistent with the lack of substantial  
334 contributions from rhizobium and clover-rhizobium interactions. In contrast, iSize captures  
335 critical yield components related to morphology, probably most prominently leaf size. In field  
336 trials, leaf size was previously identified as a trait with very high narrow sense heritability,  
337 while dry matter yield showed moderate heritability and the two traits displayed a positive  
338 genetic correlation (P. Annicchiarico et al., 1999; Jahufer et al., 1994).

339 Previous studies used pedigrees to estimate narrow sense heritability, whereas we base our  
340 analysis on material genotyped using RNA-seq, which yields a large number of markers  
341 located within genes. This allowed us to identify specific candidate genes associated with  
342 yield and initial plant size. White clover has complex allotetraploid genetics, and a large  
343 number of densely distributed markers is required to detect signals linked to causal loci  
344 because of the very low LD in outbreeding population. QTLs associated with white clover  
345 cold tolerance were identified using a tetraploid model, whereas no signals could be detected  
346 using a diploid model (Inostroza et al., 2018). However, Inostroza et al. did tetraploid  
347 genotype calling which gave a different starting point for diploid GWAS than in our models.  
348 When calling the genotypes as diploid, we found that using a standard diploid GWAS worked  
349 well. We would expect that to be the case since the two white clover sub genomes exist in  
350 parallel without recombining (Griffiths et al., 2019), which allows us to assume the presence  
351 of only two alleles per locus. It is intriguing that one of the strong GWAS signals was located  
352 near a homolog of *Arabidopsis GIGANTUS1*, which regulates biomass accumulation,  
353 potentially through effects on ribosome biogenesis. In fact, the top markers on chromosomes  
354 3 and 7 appear very tightly linked (**Supplementary figure 4**). One of the peaks is likely  
355 misplaced and the two signals probably represent a single peak near the *GIGANTUS1* gene. It  
356 has not been studied in biomass crops, and further studies will be required to determine if  
357 there is a causal effect of *GIGANTUS1* variation with respect to white clover biomass yield.

358 The results of our cross validation scheme for prediction using GWAS SNPs in an RF model  
359 provides compelling evidence for the predictive value of the associated markers. Since we  
360 were able to predict yield more accurately using the top 25 GWAS markers than using a

361 GRM based on the full set of SNPs, marker-assisted selection could potentially yield quick  
362 progress simply by applying it to subselection within existing cultivars, none of which are  
363 fixed for the alleles with positive effects on yield or initial plant size (**Supplementary figure**  
364 **4**). Our finding that we can predict yield well using a relatively small set of markers is quite  
365 surprising. Compared to an inbreeding crop like wheat, white clover has high levels of  
366 heterozygosity and rapid LD decay, which should make it difficult to select small marker-sets  
367 for prediction. In wheat, 200-300 markers were needed to achieve a prediction accuracy  
368 similar to that using GBLUP (Cericola et al., 2017; Inostroza et al., 2018). This suggests that  
369 we have successfully identified major yield QTL in white clover. Likewise, it was  
370 encouraging to see the very high prediction accuracy for F1, indicating that genomic  
371 prediction can be a very robust tool for prediction of polycross performance.  
372 The main limitations of the study is that our experiments were carried out in the greenhouse  
373 in order to be able to control the rhizobium populations and in the absence of a companion  
374 grass. The greenhouse is a warm and well-watered environment that to some degree shelters  
375 the plants from the environment, and additional factors will certainly affect field grown  
376 material. However, it is promising to see specific markers strongly linked to yield and plant  
377 size, and future trials will tell if these remain relevant in the field. Considering the results  
378 presented here, it is tempting to reiterate the suggestion to base white clover breeding on  
379 well-replicated cloned material, deferring progeny testing to late stages in the selection  
380 programme (P. Annicchiarico et al., 1999; Gibson et al., 1963). Despite a larger initial  
381 investment, determining the genetic merit of individual plants using cloned plants might be  
382 what is needed to significantly accelerate genetic gains in forage legumes.

383

## 384 Materials and Methods

### 385 Plant material and clonal propagation

386 The plant material used in this study consists of a panel of 148 white clover genotypes from  
387 20 commercial varieties with diverse agronomic qualities. To cover maximum genetic  
388 diversity, the genotypes were chosen to be as morphologically distinct as possible within each  
389 variety. To ensure genetically identical replicates from each genotype, individual plants were  
390 clonally propagated from mother plants. Four stolon cuttings were taken from the mother

391 plants with sterilised scissors including a minimum of three internodes and viable leaves. The  
392 stolons were sterilised in 1:4 bleach (Klorin, Colgate-Palmolive Company, USA) for five  
393 seconds, washed with tap water, and subsequently stored in tap water with Conserve (Dow  
394 Agrosience, Denmark) until potting (1 to 10 minutes) to prevent transfer of thrips from our  
395 breeding greenhouse to the experimental greenhouse. An overview of the experimental setup  
396 can be seen in **Figure 2A** and **2C**.

## 397 Greenhouse setup

398 The plants were grown in individual 5L pots under greenhouse conditions in Egå, Denmark  
399 (56.226°N, 10.259°W). Water and nutrients were supplied through individual feeding tubes to  
400 minimize contamination between pots (**Figure 2B**). The experiment was structured into two  
401 rounds of a randomised trial design with 10-24 replicates per clover genotype. Each round  
402 consisted of two sets where each set refers to a full setup of 883 unique clover and rhizobium  
403 combinations, each grown in 2-3 replicates per round. In round 1, cuttings were potted in  
404 gamma irradiated peat (Pindstrup Mosebrug A/S, Denmark) (**Supplementary table 4**) and  
405 stored under white plastic at 100% humidity for two weeks. The growth periods of Round 1  
406 Set 1 and Set 2 were from 11/05/2018 to 02/07/2018 (52 days) and from 05/06/2018 to  
407 26/07/2018 (42 to 49 days), respectively. In round 2, plants were potted in vermiculite (Pull  
408 Rhenen B.V., Netherlands) and stored under white plastic at 100% humidity for two weeks.  
409 The plastic storage sacks containing vermiculite were sterilised with Klorin prior to opening.  
410 The growth period of both sets in Round 2 was from 15/08/2018 to 24/10/2018 (68 to 70 days).  
411 All plants were acclimatised for a week and transferred to the main greenhouse for the trial.  
412 Immediately after removing the plastic, plants were inoculated with one of 169 genetically  
413 characterised *Rhizobium leguminosarum* bv. *trifolii* strains (Cavassim et al., 2020), or a mix of  
414 10 genetically distinct strains ( $OD_{600} = 0.001$ ). One genotype (Aearl\_07) was highly replicated  
415 and inoculated with all strains, separately. Only pots where four cuttings survived until the end  
416 of the trial were included in the analyses. Further, observations from uninoculated plants or  
417 plants inoculated with 'SM73' were removed due to contamination. To avoid a large  
418 contribution from the many Aearl\_07 observations to the subsequent analysis, its observations  
419 were scaled down to represent only observations from plants inoculated with six random  
420 symbionts. The detailed experimental setup and overview of the greenhouse is available in  
421 **Figure 2A-C**.

422 Plants were harvested at the end of the growth period. Harvested plant material was dried at  
423 35°C until a constant weight was achieved.

## 424 Image-based filtering

425 Plants were monitored using a Raspberry Pi based imaging setup (Tausen et al., 2020). The  
426 imaging setup gave rise to daily area measurements of individual plants that were used to  
427 estimate the initial size of single plants expressed as the average size of the plant during the  
428 first 10 days of growth using the Greenotyper software (Tausen et al., 2020). In addition, the  
429 daily area measurements of single plants were used to clean up the data by removing  
430 presumably unsuccessfully inoculated plants and error-prone measurements. To identify  
431 problematic data, area measurements of single plants were regressed on days past inoculation  
432 (dpi). Plants with regression coefficient  $< 100$  area/day in the interval 10-20 dpi were  
433 considered to be unsuccessfully inoculated and consequently removed. Furthermore, plants  
434 that showed an overall negative regression coefficient from 10 dpi to the remaining growth  
435 period were removed. In total this image-based filtering removed data points of 163 plants. In  
436 addition, we removed 3 clover accessions we did not have genotype data for. This gave a  
437 total of 2304 observations from 704 combinations of 145 clover and 169 rhizobium  
438 genotypes including 6-20 replicates pr. clover genotype.

## 439 Genomic data

440 RNA from a panel of 148 white clover accessions was sequenced using Illumina 150 bp  
441 Paired End reads (Novogene, Hong Kong). The RNA used for genotyping was extracted from  
442 roots of plants grown in sterile vermiculite for 8 weeks. Roots were washed with sterile  
443 water, harvested, and immediately frozen in liquid nitrogen. 2mm of the root tip was removed  
444 prior to freezing. RNA was isolated using the NucleoSpin RNA Plant (Macherey Nagel,  
445 Germany).  
446 RNA-seq reads were mapped to the reference S9 genome using the STAR software (v2.5.2)  
447 with stringent mapping to avoid ambiguous mapping between the two subgenomes (Dobin &  
448 Gingeras, 2016). Variant calling was performed for each sample separately using the  
449 HaplotypeCaller program in GATK (v3.8) outputting all confidently callable sites (McKenna  
450 et al., 2010). The outputs were then merged in batches of 20 using CombineGVCFs and  
451 finally combined into a single GVCF file which was genotyped using GenotypeGVCFs.  
452 Using SelectVariants in GATK the following filters were applied to the .vcf file: mapping

453 quality > 30, depth > 160 and quality > 20. Annotation was done using bcftools (Danecek &  
454 McCarthy, 2017). The workflow for mapping and variant calling can be found at:  
455 <https://github.com/MarniTausen/WhiteCloverRNAseq>.  
456 A number of filtering steps were applied to the raw variant data based on the S9 reference  
457 calling: all variants that are not classed as single nucleotide polymorphisms (deletions,  
458 insertions, etc.) were excluded, read depth > 300, excess heterozygosity (Phred-scaled  $p$  value  
459 for exact test of excess heterozygosity) < 150, and AN (Total number of alleles in called  
460 genotypes) > 130. SNPs with more than 10% missingness were excluded, and the remaining  
461 missing SNPs were imputed using BEAGLE version 5 with default settings (Browning et al.,  
462 2018). Further, markers with a minor allele frequency < 5% were removed and an LD-filter  
463 was applied to remove redundant information by filtering out SNPs that showed complete LD  
464 with SNPs already in the data set. In addition, SNPs that showed < 0.5 correlation with  
465 genotypes of all other SNPs located within the same gene/intergenic region were removed, as  
466 these were considered unreliable. The final set of markers consisted of 383,280 SNPs.

## 467 Population structure analysis

468 The genomic relationship matrix (GRM) for the clover genotypes was calculated as proposed  
469 by VanRaden method 1 (VanRaden, 2008):

$$470 \text{ GRM} = \frac{ZZ'}{2 \sum p_i (1-p_i)} (1)$$

471 Where  $Z$  is the centered genotype matrix with dimensions  $n \times m$ , where  $n$  is the number of  
472 individuals and  $m$  is the number of markers.  $p_i$  denotes the allele frequency of the second  
473 allele at locus  $i$ . After closer investigation of the GRM, 3 individuals were removed, as they  
474 showed very close relationship to an already present sample, and no relationship to the  
475 remaining accessions of the variety that they were labeled as belonging to, indicating a  
476 labelling error that could not be untangled. All analyses were therefore based on 145 unique  
477 genotypes.

478 Based on the GRM, a principal component analysis (PCA) was performed using the prcomp  
479 R-function and the ggfortify package for visualisation (Tang et al., 2016; R Core Team,  
480 2020).



## 481 Multiparental crosses

482 10 F1 populations were generated from plants in the 145 clover genotype greenhouse setup  
483 (**Supplementary table 5**). Crosspollination was done using bumble bees in net houses.  
484 Between 20 to 48 F1 seeds were germinated based on available seedstock for each population  
485 and grown under greenhouse conditions. Seeds were scarified using sandpaper, germinated for  
486 7 days in petri dishes, and transferred to 0.5 L pots with sterile vermiculite. All plants were  
487 inoculated with the same *Rhizobium* strain (SM42). A table watering system with the same  
488 fertiliser solution as described in the section “Greenhouse setup and phenotyping” was used  
489 throughout the growth period. After 98 days of growth under artificial light, the plants were  
490 harvested, dried, and weighed using the approach described above. One of the 10 F1  
491 populations was excluded from the downstream analysis due poor germination and/or growth  
492 resulting in < 10 offspring plants. The remaining populations had between 11 and 48 data  
493 points. Further, observations within each population with a dry weight below 1g or fresh weight  
494 below 10g were removed, since these plants had established poorly and appeared wilted.

## 495 Traits

496 Initial size (iSize) was measured by pixel counts of a plant from a 512 x 512 pixel mask in the  
497 first 10 days of growth after inoculation, i.e. before the symbiotic relationship between the  
498 plants and rhizobia strains is established. Another measurement for yield was gpd, which was  
499 reported as the dry weight of harvested plants divided by days of growth from inoculation to  
500 harvest. For this reason, gpd was overlapping with the iSize measure.

501 To get a yield measure that was less correlated with the iSize of plants, we calculated three  
502 additional yield traits: gpdCor, gpi and gpiCor.

503 gpdCor reports gpd corrected for the full effect of iSize.

504 The following equations were applied:

$$505 y_{gpd} = 1\mu + Xs + e \quad (2)$$

506 Where  $y_{gpd}$  reports the observed gpd values,  $\mu$  is the intercept,  $s$  is the fixed effect of initial size  
507 and  $e$  is a vector of residuals.  $X$  is a design matrix of  $n \times 1$  dimension, where  $n$  is the number  
508 of observations with observed initial sizes. Estimates from equation 1 was then used to  
509 calculate gpdCor:

$$510 gpdCor = y_{gpd} - Xs - 1\mu \quad (3)$$

511 Where variables and matrices are the same as reported in (2).

512 The fitting of initial size as a fixed effect was done using the “lme4” package in R (Bates et al.,  
513 2015).

514 Growth post inoculation (gpi) reports the growth per day during day 11 to day 25 past the  
515 inoculation date. The time interval was set based on a comprehensive test of the trait  
516 heritability for growth periods during different time periods and with different lengths.

517 The trait was calculated by using the image data from the greenhouse to fit a regression  
518 model to describe the linear relationship between days post inoculation (dpi) and the area of a  
519 plant. This can be written as follows:

$$520 \text{Area} = \beta_0 + \beta_1 \text{dpi} + e \quad (4)$$

521  $\beta_1$  from equation 3 was then considered our gpi trait. Although plant growth is generally  
522 exponential rather than linear, we found the linear regression a good approximation in this  
523 growth interval.

524 gpi was corrected for the full effect of iSize in a similar way as described for gpd in equations  
525 2-3 to produce gpiCor.

## 526 Phenotypic data analyses

527 The variance estimates of clover, rhizobium and clover x rhizobium interactions were  
528 calculated using the following mixed-model on the full data ( $n = 2304$ ).

$$529 y = \mu + X_1s + X_2w + X_3i + Z_1c + Z_2r + Z_3x + e \quad (5)$$

530 Where  $y$  is the vector of a trait,  $\mu$  is the overall mean,  $s$  and  $w$  are vectors reporting the spatial  
531 coordinate of a plant in the greenhouse along the north-south or east-west axis, respectively,  $i$   
532 is a vector reporting the inoculation date of plants,  $c$  is a vector of clover effects,  $r$  is a vector  
533 of rhizobium effects,  $x$  is a vector of clover x rhizobium interaction effects and  $e$  is the vector  
534 of residual effects.  $X_n$  and  $Z_n$  are design matrices of fixed and random effects, respectively.

535  $c \sim N(0, I \sigma_c^2)$ ,  $r \sim N(0, I \sigma_r^2)$ ,  $x \sim N(0, I \sigma_x^2)$  and  $e \sim N(0, I \sigma_e^2)$  where  $I$  is an identity  
536 matrix,  $\sigma_c^2, \sigma_r^2, \sigma_x^2$  and  $\sigma_e^2$  are the variances of clover, rhizobium, clover with rhizobium  
537 interaction and the residual effects, respectively.

538 After this analysis, the average phenotype of a clover genotype was calculated and used for  
539 the input in all subsequent analyses ( $n = 145$ ) including the calculation of the narrow-sense  
540 heritability and genomic prediction.

541 To estimate the narrow sense heritability the following model were fitted:

$$542 y = \mu + Z_1g + e \quad (6)$$

543 where  $y$  is a vector of 145 observations corresponding to the average performance of each  
544 clover genotype, and  $g$  denotes a vector of breeding values obtained from the following:  $g$   
545  $\sim N(0, I \sigma_a^2)$  where  $\sigma_a^2$  is the additive genetic variance as captured by the GRM. All the  
546 remaining terms are as described in equation (5)

547 The narrow sense heritability was calculated as:

$$548 \quad h^2 = \frac{\sigma_a^2}{\sigma_a^2 + \sigma_e^2} \quad (7)$$

549 Model parameters were estimated using a Bayesian mixed model relying on a Markov chain  
550 Monte Carlo (MCMC) with a length of 20,000 cycles and a burn-in of 5000. The prior  
551 distributions were uniform for fixed effects.

552 This and the estimation of the highest posterior density intervals (HPDIs) was implemented  
553 using the BayzR R-package which can be found at: <https://github.com/MarniTausen/BayzR>.

## 554 Prediction models

555 Two different approaches were used for genomic prediction of yield-related traits in the  
556 population of 145 clover genotypes. These models include a genomic best linear unbiased  
557 predictor (GBLUP) model and a two-step method where a genome-wide association study  
558 (GWAS) approach is combined with a random forest machine learning algorithm.

559 In general the GBLUP model can be written as follows:

$$560 \quad y = Xb + Zu + e \quad (8)$$

561 Where  $y$  is a vector of phenotypes,  $b$  is a vector of fixed terms which as a minimum includes  
562 the overall mean,  $u$  is a vector of random effects and contains the GEBVs of all genotyped  
563 individuals,  $e$  is the vector of residual effects, and  $X$  and  $Z$  are design matrices of fixed and  
564 random effects, respectively.  $u \sim N(0, G \sigma_a^2)$  and  $e \sim N(0, I \sigma_e^2)$  where  $G$  is the GRM,  $I$  is an  
565 identity matrix,  $\sigma_a^2$  is the additive genetic variance and  $\sigma_e^2$  is the residual variance.

566 Using the GBLUP we modeled the gpd response as follows:

$$567 \quad y = \mu + Z_1 g + e \quad (9)$$

568 Where  $y$  is a vector of 145 observations for the yield-related trait,  $\mu$  is the overall mean,  $g$  is a  
569 vector of additive genetic effects from the GRM, and  $Z$  and  $e$  are as in (8). The GBLUP  
570 model was fitted using the BGLR R-package where the total number of iterations was 20,000  
571 and the burn-in was 5000 (Pérez & de los Campos, 2014).

572 In the second approach used for yield prediction the first step included a GWAS performed  
573 using a python implementation of the EMMAX algorithm followed by  $p$  value adjustment

574 using EMMA on the top 200 most significant markers (Kang et al., 2008, 2010). The MAC  
575 parameter was set to 6. The implementation can be found here:  
576 <https://app.assembla.com/spaces/atgwas/git/source>. Markers were then ordered from lowest  
577 to highest  $p$  values, and a genotype file based on  $n$  top markers, or  $n$  random markers were  
578 produced.  $n$  was set to 25 or 200. In the second step this genotype file was used as the input  
579 for the RF ML algorithm proposed by Breiman (Breiman, 2001). The RF algorithm was  
580 implemented in R using the package “caret” (Max Kuhn, 2020) with the ranger method. The  
581 importance of each marker was estimated by using the in-built permutation variable  
582 importance approach, which permutes the genotypic values associated with a given marker  
583 and then tests the accuracy of the resulting trees and compares it with the accuracy of the tree  
584 produced before permutation. The variable importance is then estimated as the difference  
585 between the accuracy values and finally scaled to be between 0 and 100 (Wright & Ziegler,  
586 2017; Max Kuhn, 2020).

## 587 Cross-validation

588 The performance of the prediction models were evaluated using a 6-fold cross validation  
589 scheme that was repeated 100 times. In this scheme phenotyped individuals were randomly  
590 divided into 6 non-overlapping subsets of similar sizes. Each subset ( $\frac{1}{6}$ ) then took turns  
591 functioning as the testing population by having phenotype values masked and predicted from  
592 the phenotypes and genotypes of the remaining ( $\frac{5}{6}$ ) individuals contributing the training  
593 population. In the GWAS+RF method, the testing populations were excluded from the  
594 GWAS study, meaning that top SNPs were estimated based on the training population alone.  
595 The predictive ability was estimated calculating the Pearson correlation between genomic  
596 estimated breeding values (GEBVs) and the observed phenotypes. The significance of a  
597 correlation was tested using the agricolae package in R (de Mendiburu, 2010).  
598 The prediction accuracy was calculated by dividing the predictive ability with the square root  
599 of the narrow sense heritability (equation 9):

$$600 \text{ accuracy} = \frac{\text{cor}(\text{GEBV}, y)}{\sqrt{h^2}} \quad (10)$$

601 We also set up a validation system to predict yield across generations. This was done by  
602 having the 4 to 6 parents of an F1 population constitute the testing population and have the  
603 remaining 141 to 139 accessions constitute the training population using their gpd traits and  
604 genotypes to train the model. To assess the predictive ability of the cross-generation  
605 prediction, Pearson correlations were calculated between the average dry weight and the

606 average parental GEBV of the nine F1 populations, naively assuming that all parents had  
607 contributed equally to an F1 population.

608

## 609 Statistical tests for comparison of prediction methods and F1 means

610 To test whether prediction methods differed significantly in their predictive ability the  
611 following sign test were applied:

612 First we set up a null hypothesis stating that the predictive ability of method A and method B  
613 did not differ in performance. That is on average we would expect the correlation of method  
614 A to come out higher than method B in 50% of the cases and lower in the remaining 50% of  
615 the cases due to randomness. We viewed the distribution as binomial, calculating the number  
616 of successes ( $x$ ) as the observed number of times method A outperformed method B in the  
617 100 repeats ( $n$ ). We then used the inbuilt `pbinom` function in R to calculate the cumulative  
618 probability of  $x$  successes or less in  $n$  observations given a probability of 0.5. This probability  
619 was reported as the  $p$  value. For  $x > 50$  we calculated  $p$  as 1 subtracted the cumulative  
620 probability of  $x$  successes in  $n$  trials given probability 0.5. Consequently,  $p$  values report the  
621 probability of the observed or something more extreme.

622 The means of F1 population dry weights were compared with a Tukey test in R using the  
623 built-in Tukey honestly significant difference (HSD) function.

624 All scripts used for statistical analyses and visualisation of data is available at:

625 [https://github.com/cks2903/White\\_Clover\\_GenomicPrediction\\_2020](https://github.com/cks2903/White_Clover_GenomicPrediction_2020)

626

## 627 Replicate reduction

628 Prior to the replicate reduction analyses, the full data set ( $n = 2304$ ) was filtered to include  
629 only genotypes with at least 10 replicates which included a total of 142 genotypes.

630 Subsequently, random replicates were removed for each genotype until only 10 replicates  
631 were left per genotype. Phenotypes were then averaged for genotypes, and a six-fold cross  
632 validation was used to estimate the Pearson correlation between the observed phenotypes of a  
633 yield trait and the predicted GEBV. Replicate reduction then followed in a stepwise manner  
634 which removed one additional random replicate pr. genotype in each step, calculated the  
635 resulting genotype mean, and tested the resulting correlation. The full stepwise reduction was

636 repeated 100 times. The replicate reduction was applied to the cross-generation prediction as  
637 well.

## 638 Author Contributions

639 Conceptualization, S.U.A., S.M; Methodology, C.K.S., S.M., S.U.A., L.J.; Software, C.K.S.,  
640 L.J., M.T, S.M., R.W.; Validation, C.K.S., M.T., S.M., S.U.A., L.J.; Formal Analysis, C.K.S.,  
641 S.M., M.T., R.W; Investigation, S.M., C.K.S, M.T., N.R.; Resources, L.J., S.U.A., N.R.; Data  
642 Curation, C.K.S., S.M., M.T.; Writing – Original Draft, C.K.S., S.M.; Writing – Review &  
643 Editing, S.U.A., C.K.S., S.M.; Visualization, S.M., C.K.S.; Supervision, S.U.A., L.J.; Project  
644 Administration, S.U.A.; Funding Acquisition, S.U.A.

## 645 Acknowledgements

646 We thank Finn Pedersen, Nanna Walther, Mike Ladefoged Damholdt, and Karina A.  
647 Kristensen for plant work and greenhouse tending, M. Izabel C. Alves, Trine F. Gadeberg,  
648 Caroline Benfeldt, Camous Moslemi, Leandro A. Escobar-Herrera for help in the greenhouse,  
649 and Marc Clausen for implementing the technical part of the imaging system. This work was  
650 funded by grant no. 4105-00007A from Innovation Fund Denmark (S.U.A.).  
651

## 652 Conflict of interest

653 DLF has developed and markets the cultivars Brianna, Klondike, Rabbani, Riesling, Silvester  
654 and Violin that were analysed in this study.  
655

## 656 References

657 Annicchiarico, P., Nazzicari, N., Li, X., Wei, Y., Pecetti, L., & Brummer, E. C. (2015). Accuracy  
658 of genomic selection for alfalfa biomass yield in different reference populations. *BMC*  
659 *Genomics*, 16, 1020.

- 660 Annicchiarico, P., Piano, E., & Rhodes, I. (1999). Heritability of, and genetic correlations  
661 among, forage and seed yield traits in Ladino white clover. In *Plant Breeding* (Vol. 118, Issue 4,  
662 pp. 341–346). <https://doi.org/10.1046/j.1439-0523.1999.00387.x>
- 663 Archer, M. (1973). THE SPECIES PREFERENCES OF GRAZING HORSES. In *Grass and*  
664 *Forage Science* (Vol. 28, Issue 3, pp. 123–128). [https://doi.org/10.1111/j.1365-](https://doi.org/10.1111/j.1365-2494.1973.tb00732.x)  
665 [2494.1973.tb00732.x](https://doi.org/10.1111/j.1365-2494.1973.tb00732.x)
- 666 Barrett, B. A., Baird, I. J., & Woodfield, D. R. (2005). A QTL Analysis of White Clover Seed  
667 Production. In *Crop Science* (Vol. 45, Issue 5, pp. 1844–1850).  
668 <https://doi.org/10.2135/cropsci2004.0679>
- 669 Bates D, Mächler M, Bolker B, Walker S (2015). “Fitting Linear Mixed-Effects Models Using  
670 lme4.” *Journal of Statistical Software*, 67(1), 1–48. doi: 10.18637/jss.v067.i01.
- 671 Bernardo, R. (2008). Molecular Markers and Selection for Complex Traits in Plants: Learning  
672 from the Last 20 Years. In *Crop Science* (Vol. 48, Issue 5, pp. 1649–1664).  
673 <https://doi.org/10.2135/cropsci2008.03.0131>
- 674 Bradshaw, J. E. (2016). *Plant Breeding: Past, Present and Future*. [https://doi.org/10.1007/978-3-](https://doi.org/10.1007/978-3-319-23285-0)  
675 [319-23285-0](https://doi.org/10.1007/978-3-319-23285-0)
- 676 Breiman, L. Random Forests. *Machine Learning* **45**, 5–32 (2001).  
677 <https://doi.org/10.1023/A:1010933404324>
- 678 Browning, B. L., Zhou, Y., & Browning, S. R. (2018). A One-Penny Imputed Genome from  
679 Next-Generation Reference Panels. *American Journal of Human Genetics*, 103(3), 338–348.
- 680 Caradus, J. R., Woodfield, D. R., & Stewart, A. V. (1995). Overview and vision for white clover.  
681 *NZGA: Research and Practice Series*, 6, 1-6.
- 682 Cavassim, M. I. A., Moeskjær, S., Moslemi, C., Fields, B., Bachmann, A., Vilhjálmsson, B. J.,  
683 Schierup, M. H., W Young, J. P., & Andersen, S. U. (2020). Symbiosis genes show a unique  
684 pattern of introgression and selection within a species complex. *Microbial Genomics*, 6(4).  
685 <https://doi.org/10.1099/mgen.0.000351>
- 686 Cericola, F., Jahoor, A., Orabi, J., Andersen, J. R., Janss, L. L., & Jensen, J. (2017). Optimizing  
687 Training Population Size and Genotyping Strategy for Genomic Prediction Using Association

- 688 Study Results and Pedigree Information. A Case of Study in Advanced Wheat Breeding Lines.  
689 *PloS One*, 12(1), e0169606.
- 690 Crush, J. R. (1995). Rhizobiumstrain × host genotype interactions for white clover(*Trifolium*  
691 *repens*L.) genotypes with different aluminium tolerances. In *New Zealand Journal of*  
692 *Agricultural Research* (Vol. 38, Issue 2, pp. 163–167).  
693 <https://doi.org/10.1080/00288233.1995.9513115>
- 694 Danecek, P., & McCarthy, S. A. (2017). BCFtools/csq: haplotype-aware variant consequences.  
695 *Bioinformatics* , 33(13), 2037–2039.
- 696 Dobin, A., & Gingeras, T. R. (2016). Optimizing RNA-Seq Mapping with STAR. *Methods in*  
697 *Molecular Biology* , 1415, 245–262.
- 698 Faville, M. J., Griffiths, A. G., Jahufer, M. Z. Z., & Barrett, B. A. (2012). Progress towards  
699 marker-assisted selection in forages. In *Proceedings of the New Zealand Grassland Association*  
700 (pp. 189–194). <https://doi.org/10.33584/jnzg.2012.74.2860>
- 701 Gachomo, E. W., Jimenez-Lopez, J. C., Baptiste, L. J., & Kotchoni, S. O. (2014). GIGANTUS1  
702 (GTS1), a member of Transducin/WD40 protein superfamily, controls seed germination, growth  
703 and biomass accumulation through ribosome-biogenesis protein interactions in *Arabidopsis*  
704 *thaliana*. *BMC Plant Biology*, 14, 37.
- 705 Gibson, P. B., Beinhart, G., Halpin, J. E., & Hollowell, E. A. (1963). Selection and Evaluation of  
706 White Clover Clones. I. Basis for Selection and a Comparison of Two Methods of Propagation  
707 for Advanced Evaluations 1. In *Crop Science* (Vol. 3, Issue 1, pp. 83–86).  
708 <https://doi.org/10.2135/cropsci1963.0011183x000300010025x>
- 709 Griffiths, A. G., Moraga, R., Tausen, M., Gupta, V., Bilton, T. P., Campbell, M. A., Ashby, R.,  
710 Nagy, I., Khan, A., Larking, A., Anderson, C., Franzmayr, B., Hancock, K., Scott, A., Ellison, N.  
711 W., Cox, M. P., Asp, T., Mailund, T., Schierup, M. H., & Andersen, S. U. (2019). Breaking Free:  
712 The Genomics of Allopolyploidy-Facilitated Niche Expansion in White Clover. *The Plant Cell*,  
713 31(7), 1466–1487.
- 714 Grüneberg, W., Mwanga, R., Andrade, M., & Espinoza, J. (2009). Selection methods. Part 5:  
715 Breeding clonally propagated crops. *Plant breeding and farmer participation*, 275-322.



716 Hayes, B. J., Cogan, N. O. I., Pembleton, L. W., Goddard, M. E., Wang, J., Spangenberg, G. C.,  
717 & Forster, J. W. (2013). Prospects for genomic selection in forage plant species. In *Plant*  
718 *Breeding* (Vol. 132, Issue 2, pp. 133–143). <https://doi.org/10.1111/pbr.12037>

719 Hoyos-Villegas, V., O'Connor, J. R., Heslop, A. D., Hilditch, A., Jahufer, M. Z. Z., & Barrett, B.  
720 A. (2019). Rate of Genetic Gain for Persistence to Grazing and Dry Matter Yield in White  
721 Clover across 90 Years of Cultivar Development. In *Crop Science* (Vol. 59, Issue 2, pp. 537–  
722 552). <https://doi.org/10.2135/cropsci2018.07.0471>

723 Inostroza, L., Bhakta, M., Acuña, H., Vásquez, C., Ibáñez, J., Tapia, G., Mei, W., Kirst, M.,  
724 Resende, M., & Munoz, P. (2018). Understanding the Complexity of Cold Tolerance in White  
725 Clover using Temperature Gradient Locations and a GWAS Approach. In *The Plant Genome*  
726 (Vol. 11, Issue 3, p. 170096). <https://doi.org/10.3835/plantgenome2017.11.0096>

727 Irisarri, P., Cardozo, G., Tartaglia, C., Reyno, R., Gutiérrez, P., Lattanzi, F. A., Rebuffo, M., &  
728 Monza, J. (2019). Selection of Competitive and Efficient Rhizobia Strains for White Clover.  
729 *Frontiers in Microbiology*, 10. <https://doi.org/10.3389/fmicb.2019.00768>

730 Jahufer, M. Z. Z., Cooper, M., & Brien, L. A. (1994). Genotypic variation for stolon and other  
731 morphological attributes of white clover (*Trifolium repens* L.). Populations and their influence  
732 on herbage yield in the summer rainfall region of New South Wales. In *Australian Journal of*  
733 *Agricultural Research* (Vol. 45, Issue 3, p. 703). <https://doi.org/10.1071/ar9940703>

734 Kang, H. M., Sul, J. H., Service, S. K., Zaitlen, N. A., Kong, S.-Y., Freimer, N. B., Sabatti, C., &  
735 Eskin, E. (2010). Variance component model to account for sample structure in genome-wide  
736 association studies. *Nature Genetics*, 42(4), 348–354.

737 Kang, H. M., Zaitlen, N. A., Wade, C. M., Kirby, A., Heckerman, D., Daly, M. J., & Eskin, E.  
738 (2008). Efficient control of population structure in model organism association mapping.  
739 *Genetics*, 178(3), 1709–1723.

740 Kaur, P., Appels, R., Bayer, P. E., Keeble-Gagnere, G., Wang, J., Hirakawa, H., Shirasawa, K.,  
741 Vercoe, P., Stefanova, K., Durmic, Z., Nichols, P., Revell, C., Isobe, S. N., Edwards, D., &  
742 Erskine, W. (2017). Climate Clever Clovers: New Paradigm to Reduce the Environmental  
743 Footprint of Ruminants by Breeding Low Methanogenic Forages Utilizing Haplotype Variation.

- 744 *Frontiers in Plant Science*, 8, 1463.
- 745 Kuhn, M. (2015). Caret: classification and regression training. Astrophysics Source Code  
746 Library, ascl-1505.
- 747 Lowther, W. L., & Kerr, G. A. (2011). White clover seed inoculation and coating in New  
748 Zealand. In *Proceedings of the New Zealand Grassland Association* (pp. 93–102).  
749 <https://doi.org/10.33584/jnzg.2011.73.2841>
- 750 Matsubara, K., Yamamoto, E., Kobayashi, N., Ishii, T., Tanaka, J., Tsunematsu, H., Yoshinaga,  
751 S., Matsumura, O., Yonemaru, J.-I., Mizobuchi, R., Yamamoto, T., Kato, H., & Yano, M.  
752 (2016). Improvement of Rice Biomass Yield through QTL-Based Selection. *PloS One*, 11(3),  
753 e0151830.
- 754 McKenna, A., Hanna, M., Banks, E., Sivachenko, A., Cibulskis, K., Kernysky, A., Garimella,  
755 K., Altshuler, D., Gabriel, S., Daly, M., & DePristo, M. A. (2010). The Genome Analysis  
756 Toolkit: a MapReduce framework for analyzing next-generation DNA sequencing data. *Genome*  
757 *Research*, 20(9), 1297–1303.
- 758 de Mendiburu, F., & de Mendiburu, M. F. (2019). Package ‘agricolae’. R Package, Version, 1-2.
- 759 Meuwissen, T. H., Hayes, B. J., & Goddard, M. E. (2001). Prediction of total genetic value using  
760 genome-wide dense marker maps. *Genetics*, 157(4), 1819–1829.
- 761 Miedaner, T., Haffke, S., Siekmann, D., Joachim Fromme, F., Roux, S. R., & Hackauf, B.  
762 (2018). Dynamic quantitative trait loci (QTL) for plant height predict biomass yield in hybrid rye  
763 (*Secale cereale* L.). In *Biomass and Bioenergy* (Vol. 115, pp. 10–18).  
764 <https://doi.org/10.1016/j.biombioe.2018.04.001>
- 765 Moeskjær, S., Tausen, M., Andersen, S. U., & Young, J. P. W. (n.d.). *Amplicons and isolates:*  
766 *Rhizobium diversity in fields under conventional and organic management.*  
767 <https://doi.org/10.1101/2020.09.22.307934>
- 768 Mytton, L. R. (1975). Plant genotype × rhizobium strain interactions in white clover. In *Annals*  
769 *of Applied Biology* (Vol. 80, Issue 1, pp. 103–107). [https://doi.org/10.1111/j.1744-](https://doi.org/10.1111/j.1744-7348.1975.tb01604.x)  
770 [7348.1975.tb01604.x](https://doi.org/10.1111/j.1744-7348.1975.tb01604.x)
- 771 Pérez, P., & de los Campos, G. (2014). Genome-wide regression and prediction with the BGLR

- 772 statistical package. *Genetics*, 198(2), 483–495.
- 773 R Core Team (2020). R: A Language and Environment for Statistical Computing.
- 774 <https://www.R-project.org>
- 775 Ruz-Jerez, B. E., Roger Ball, P., White, R. E., & Gregg, P. E. H. (1991). Comparison of a herbal  
776 ley with a ryegrass-white clover pasture and pure ryegrass sward receiving fertiliser nitrogen. In  
777 *Proceedings of the New Zealand Grassland Association* (pp. 225–230).
- 778 <https://doi.org/10.33584/jnzg.1991.53.1982>
- 779 Sakiroglu, M., & Brummer, E. C. (2017). Identification of loci controlling forage yield and  
780 nutritive value in diploid alfalfa using GBS-GWAS. *TAG. Theoretical and Applied Genetics*.  
781 *Theoretische Und Angewandte Genetik*, 130(2), 261–268.
- 782 Svenning, M. M., Gudmundsson, J., Fagerli, I.-L., & Leinonen, P. (2001). Competition for  
783 Nodule Occupancy Between Introduced Strains of *Rhizobium leguminosarum* Biovar trifolii and  
784 its Influence on Plant Production. *Annals of Botany*, 88(suppl\_1), 781–787.
- 785 Svenning, M. M., Junttila, O., & Solheim, B. (1991). Symbiotic growth of indigenous white  
786 clover (*Trifolium repens*) with local *Rhizobium leguminosarum* biovar trifolii. In *Physiologia*  
787 *Plantarum* (Vol. 83, Issue 3, pp. 381–389). <https://doi.org/10.1034/j.1399-3054.1991.830308.x>
- 788 Tang, Y., Horikoshi, M., & Li, W. (2016). ggfortify: Unified Interface to Visualize Statistical  
789 Results of Popular R Packages. In *The R Journal* (Vol. 8, Issue 2, p. 474).
- 790 <https://doi.org/10.32614/rj-2016-060>
- 791 Tausen, M., Clausen, M., Moeskjær, S., Shihavuddin, A., Dahl, A. B., Janss, L., & Andersen, S.  
792 U. (2020). Greenotyper: Image-Based Plant Phenotyping Using Distributed Computing and Deep  
793 Learning. *Frontiers in Plant Science*, 11, 1181.
- 794 Thomson, D. J., Beever, D. E., Haines, M. J., Cammell, S. B., Evans, R. T., Dhanoa, M. S., &  
795 Austin, A. R. (1985). Yield and composition of milk from Friesian cows grazing either perennial  
796 ryegrass or white clover in early lactation. In *Journal of Dairy Research* (Vol. 52, Issue 1, pp.  
797 17–31). <https://doi.org/10.1017/s0022029900023852>
- 798 VanRaden, P. M. (2008). Efficient Methods to Compute Genomic Predictions. In *Journal of*  
799 *Dairy Science* (Vol. 91, Issue 11, pp. 4414–4423). <https://doi.org/10.3168/jds.2007-0980>

- 800 Voss-Fels, K. P., Cooper, M., & Hayes, B. J. (2019). Accelerating crop genetic gains with  
801 genomic selection. *TAG. Theoretical and Applied Genetics. Theoretische Und Angewandte*  
802 *Genetik*, 132(3), 669–686.
- 803 Wright, M. N., & Ziegler, A. (2017). ranger: A Fast Implementation of Random Forests for High  
804 Dimensional Data in C and R. In *Journal of Statistical Software* (Vol. 77, Issue 1).  
805 <https://doi.org/10.18637/jss.v077.i01>
- 806 Young, N. R., & Mytton, L. R. (1983). The response of white clover to different strains of  
807 *Rhizobium trifolii* in hill land reseeded. In *Grass and Forage Science* (Vol. 38, Issue 1, pp. 13–  
808 19). <https://doi.org/10.1111/j.1365-2494.1983.tb01615.x>
- 809 Zhao, N., Yu, X., Jie, Q., Li, H., Li, H., Hu, J., Zhai, H., He, S., & Liu, Q. (2013). A genetic  
810 linkage map based on AFLP and SSR markers and mapping of QTL for dry-matter content in  
811 sweetpotato. In *Molecular Breeding* (Vol. 32, Issue 4, pp. 807–820).  
812 <https://doi.org/10.1007/s11032-013-9908-y>

813 **Figures**

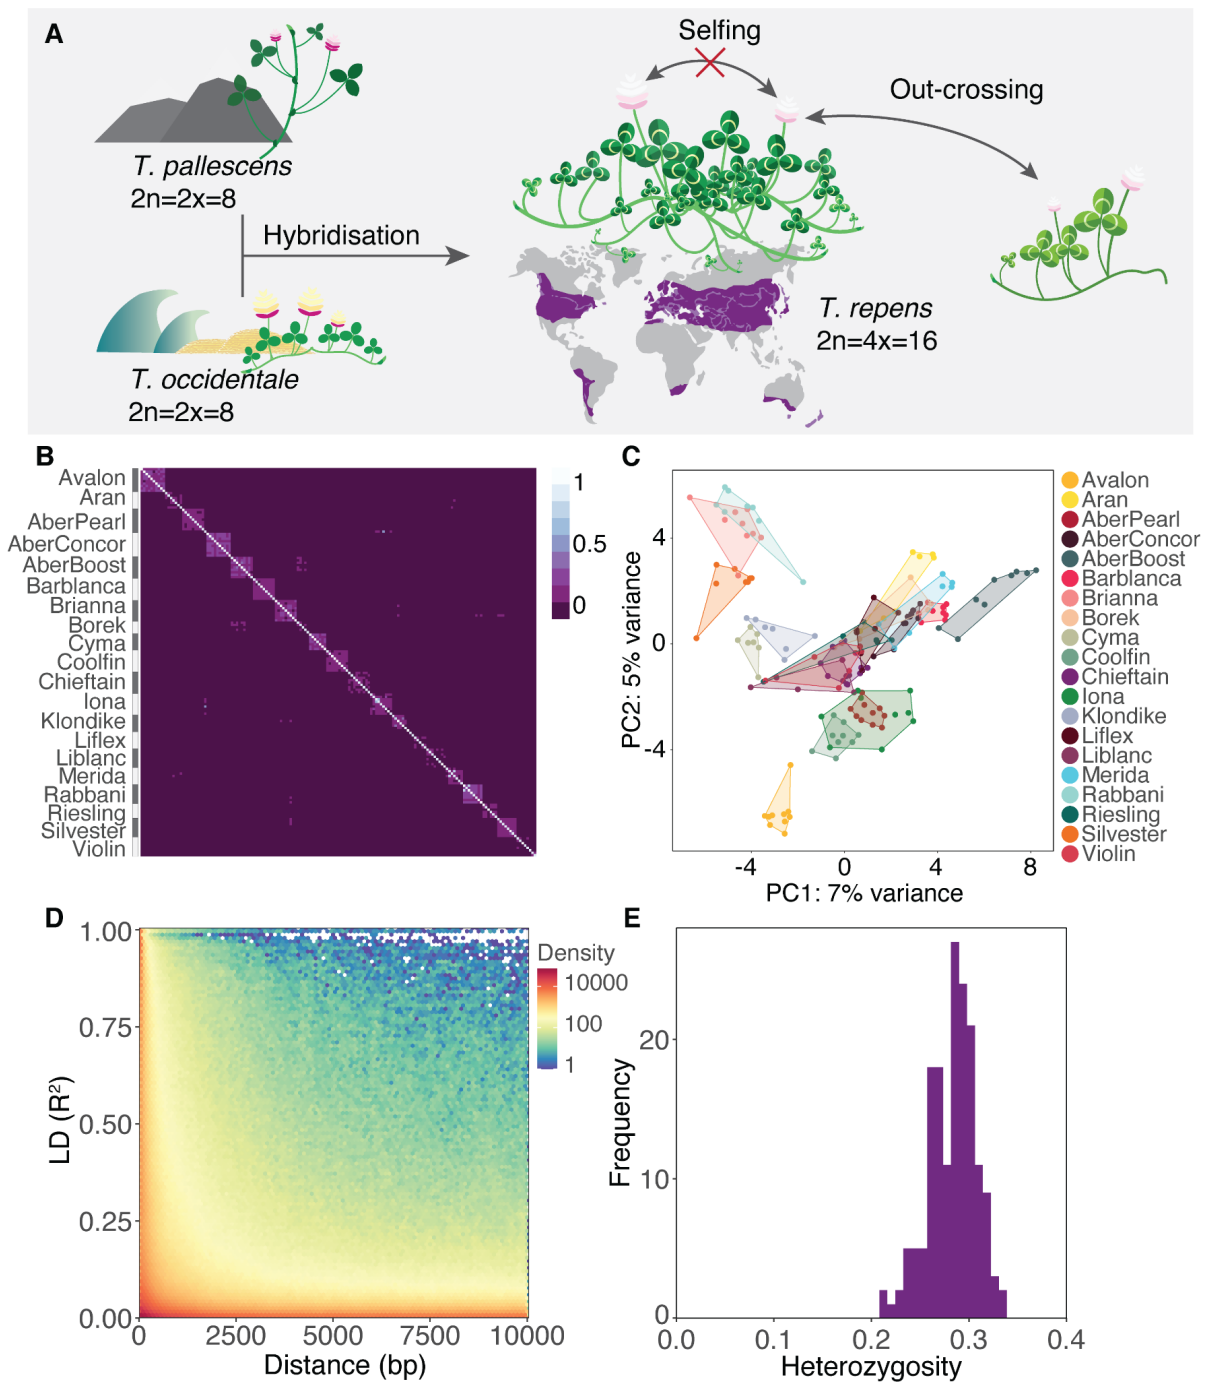

814

815 **Figure 1.** Characterization of the white clover population. **A:** White clover origin, range, and

816 out-crossing mating habit. **B:** Heat map of genomic relationship matrix (GRM) for the 148

817 clover genotypes. **C:** Population structure of the 148 clover genotypes by the first two

818 principal components of the GRM. **D:** LD ( $R^2$ ) for the RNAseq SNP dataset. **E:**

819 Heterozygosity of individuals.

820

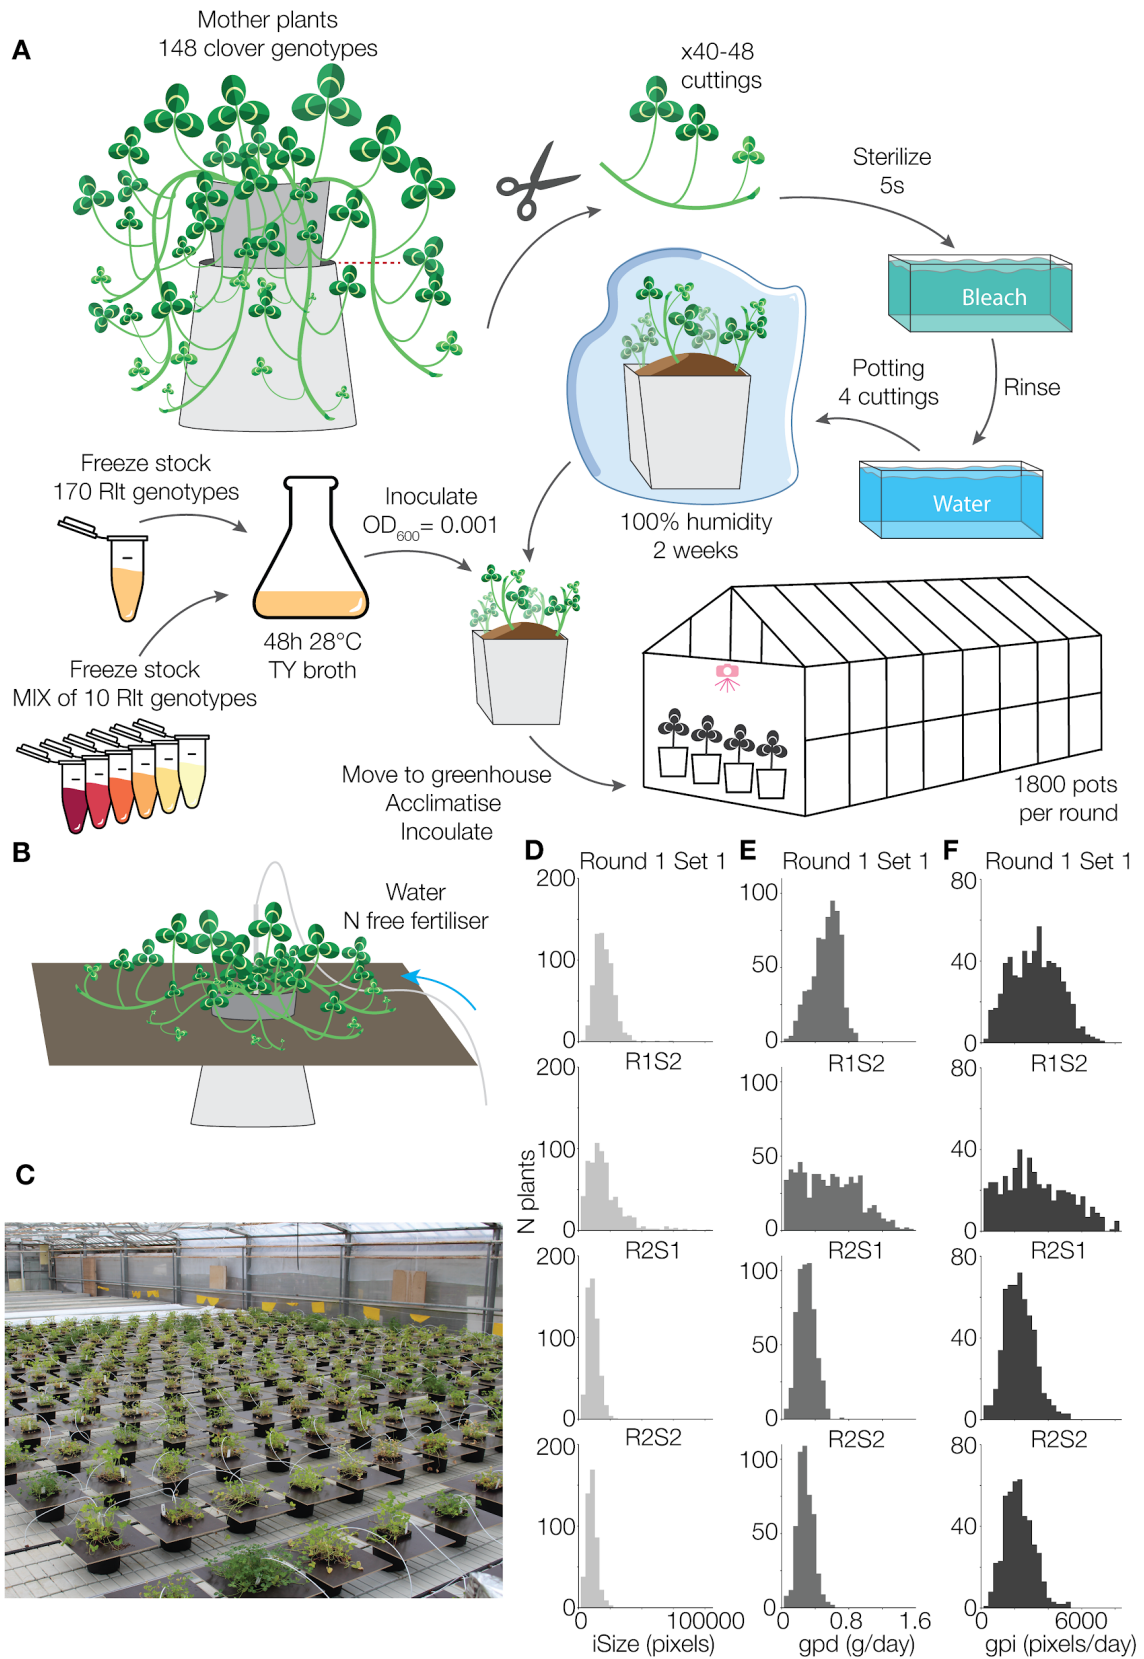

821

822

823

824 **Figure 2.** Experimental setup. **A:** Clonal propagation of 148 clover mother plants and the  
825 potting method. Each pot was inoculated with either one of 170 individual, characterised *Rlt*  
826 strains or a mix of 10 genetically diverse strains. **B:** Individual pot setup and drip watering  
827 system. **C:** Picture from the greenhouse showing the setup. **D-F:** Histograms of raw data after  
828 filtering for **D:** initial size (*iSize*,  $n = 2392$ ), **E:** growth per day (*gpd*,  $n = 2392$ ), and **F:**  
829 growth rate during nitrogen fixation (*gpi*,  $n = 2203$ ).



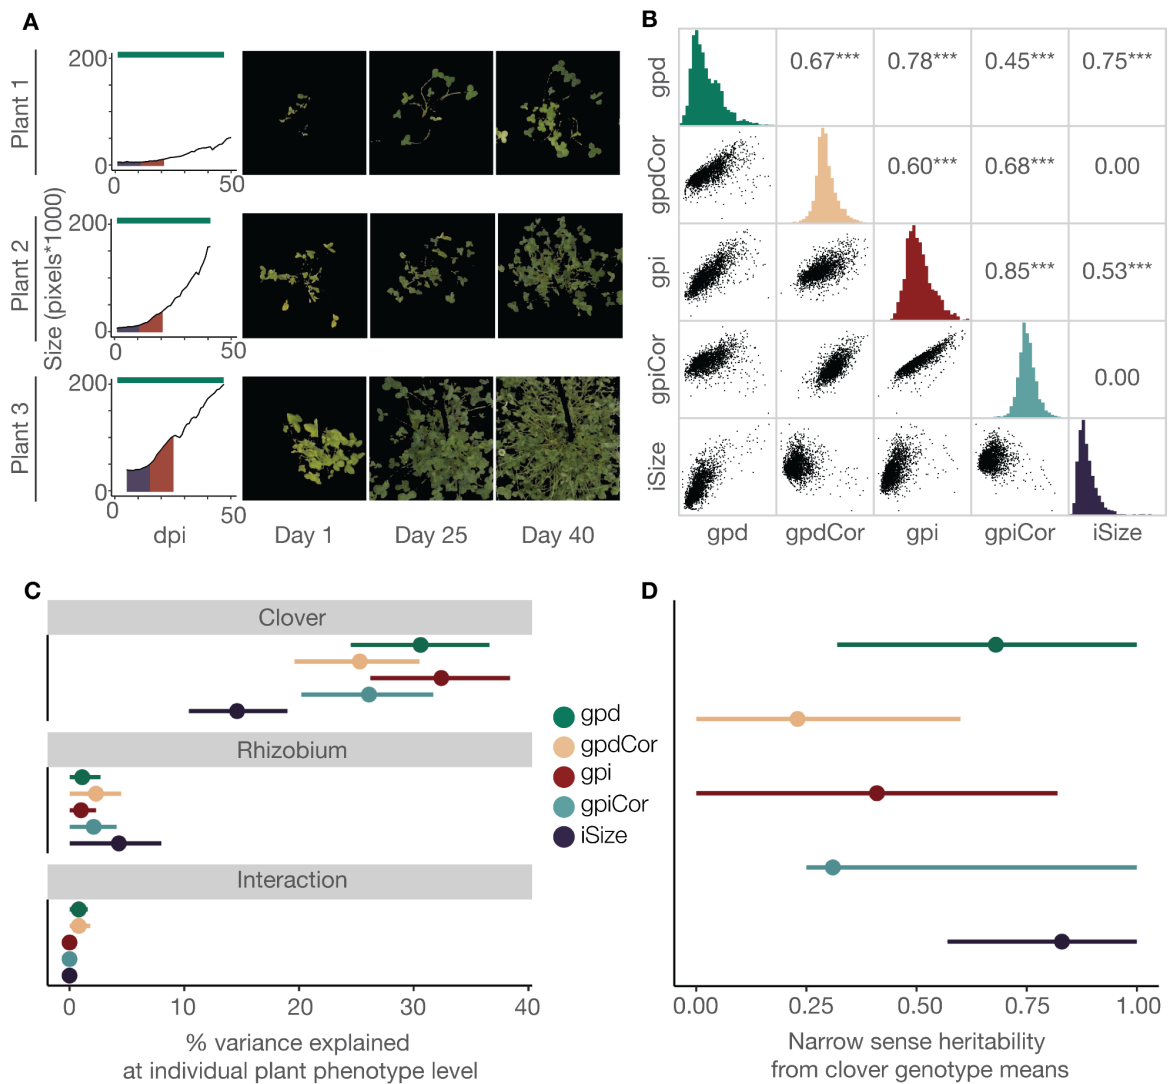

830

831 **Figure 3.** Phenotypic data and trait heritabilities. **A:** Growth curves and masks of individual  
832 plants from the clover genotype Banna\_0204 at the end of the 10 day initial size interval,

833 after 25 days, and after 40 days. Growth curves indicate the days past inoculation (dpi) used

834 to extract the different phenotypes; day 1-10: iSize (purple), day 11-20: gpi (red), and day 0-

835 harvest: gpd (teal). **B:** Pairwise correlation of traits. The diagonal shows histogram of each

836 trait. Left of the diagonal: scatter plots of pairwise comparisons between gpd, gpdCor, gpi,

837 gpiCor, and iSize. Right of the diagonal: Pearson product moment correlation coefficients.  $n$

838 = 2304. **C-D:** Estimation of variance components and heritabilities of different yield-related

839 traits. Estimates (dots) and their 95% highest posterior density intervals (lines) are coloured

840 by trait. **C:** The estimated percentage of phenotypic variance explained by clover, rhizobium

841 or the clover x rhizobium interaction using all observations,  $n = 2304$ . **D**: The estimated  
842 narrow sense heritability ( $h^2$ ) of the traits when averaging across clover genotypes,  $n = 145$ .  
843 Note that **(C)** is based on individual plant phenotypes, whereas **(D)** is based on clover  
844 genotype means. This is why the narrow sense heritability is larger than the broad sense  
845 heritability for some traits.  
846

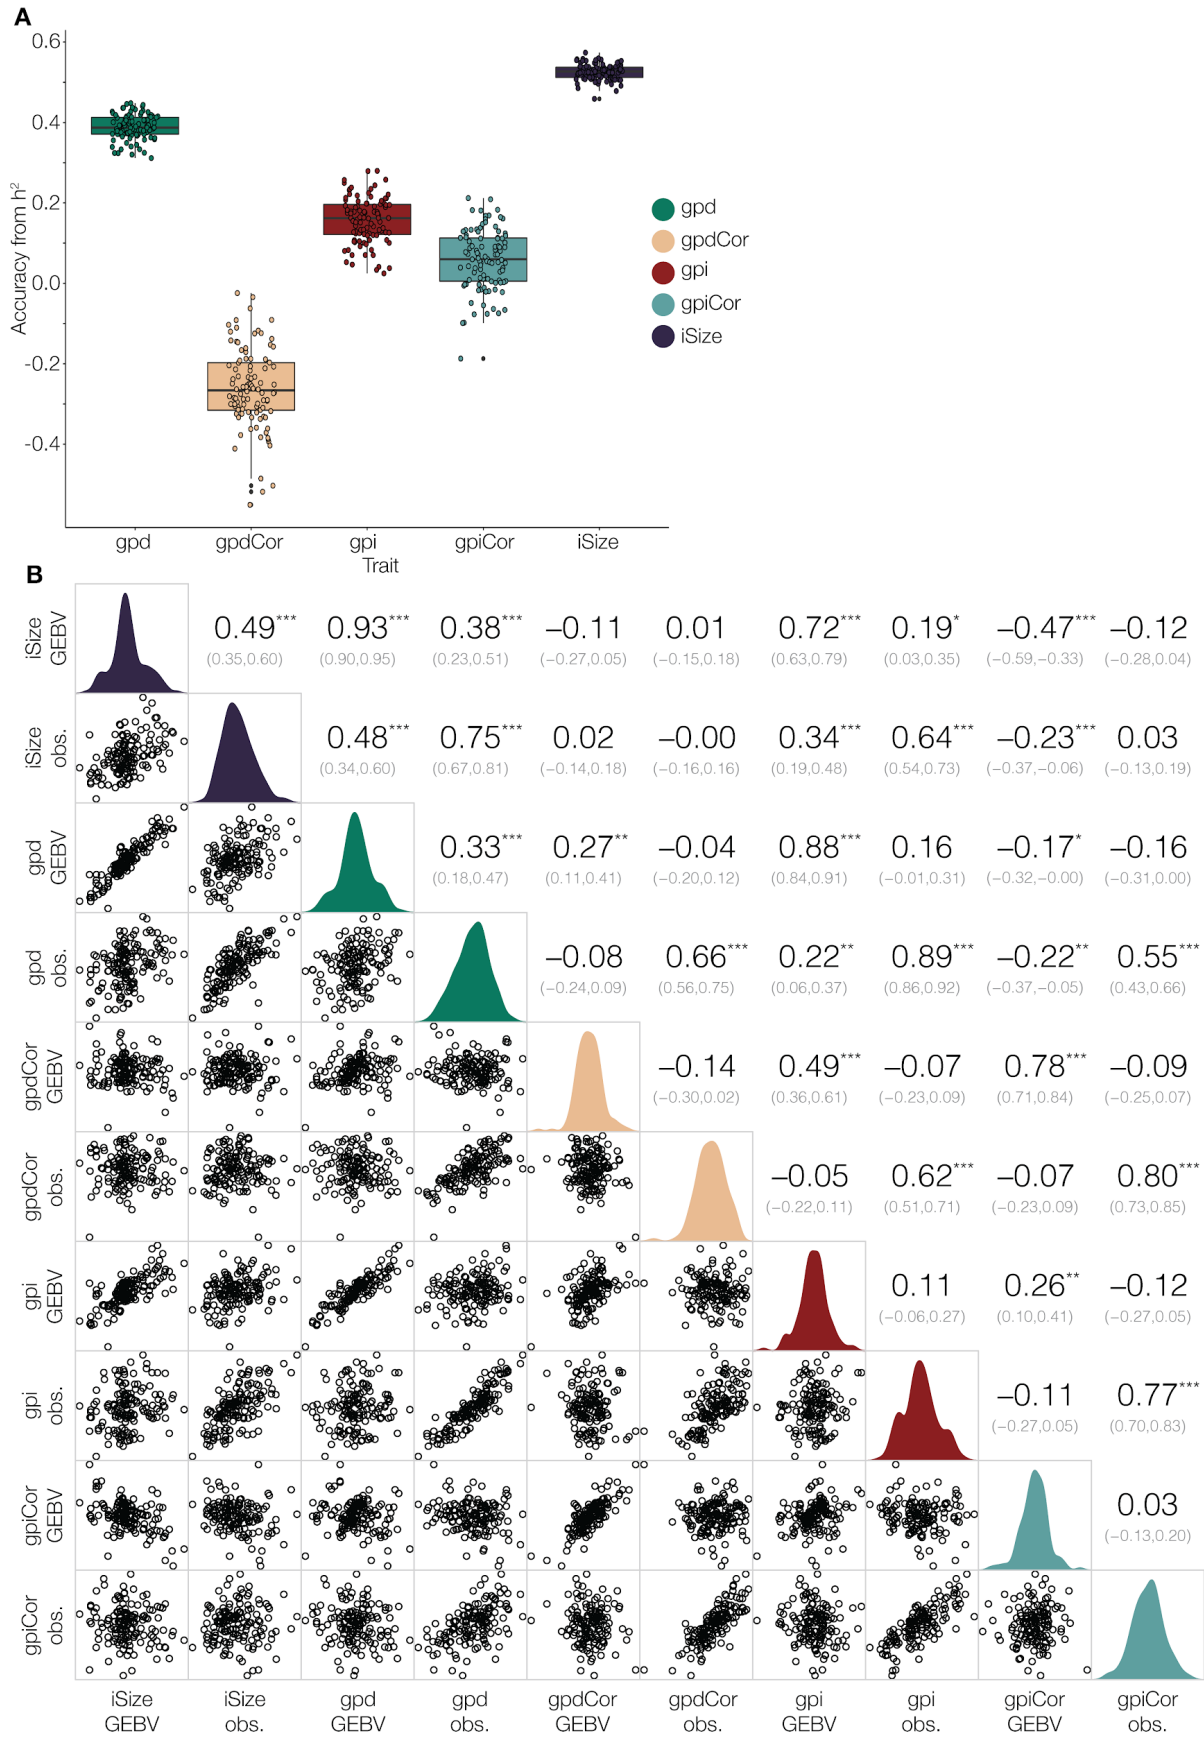

848 **Figure 4.** Genomic prediction of *gpd*, *gpdCor*, *gpi*, *gpiCor*, and *iSize*. **A:** Boxplot of  
849 prediction accuracies based on 100 rounds of GBLUP. **B:** Correlations of traits and their  
850 GBLUP-produced GEBVs. Confidence intervals of correlation coefficients are given in  
851 parentheses and asterisks indicate significance of correlations \*,  $p < 0.05$ ; \*\*,  $p < 0.01$ ; \*\*\*,  $p$   
852  $< 0.001$ .  $n = 145$ .  
853  
854

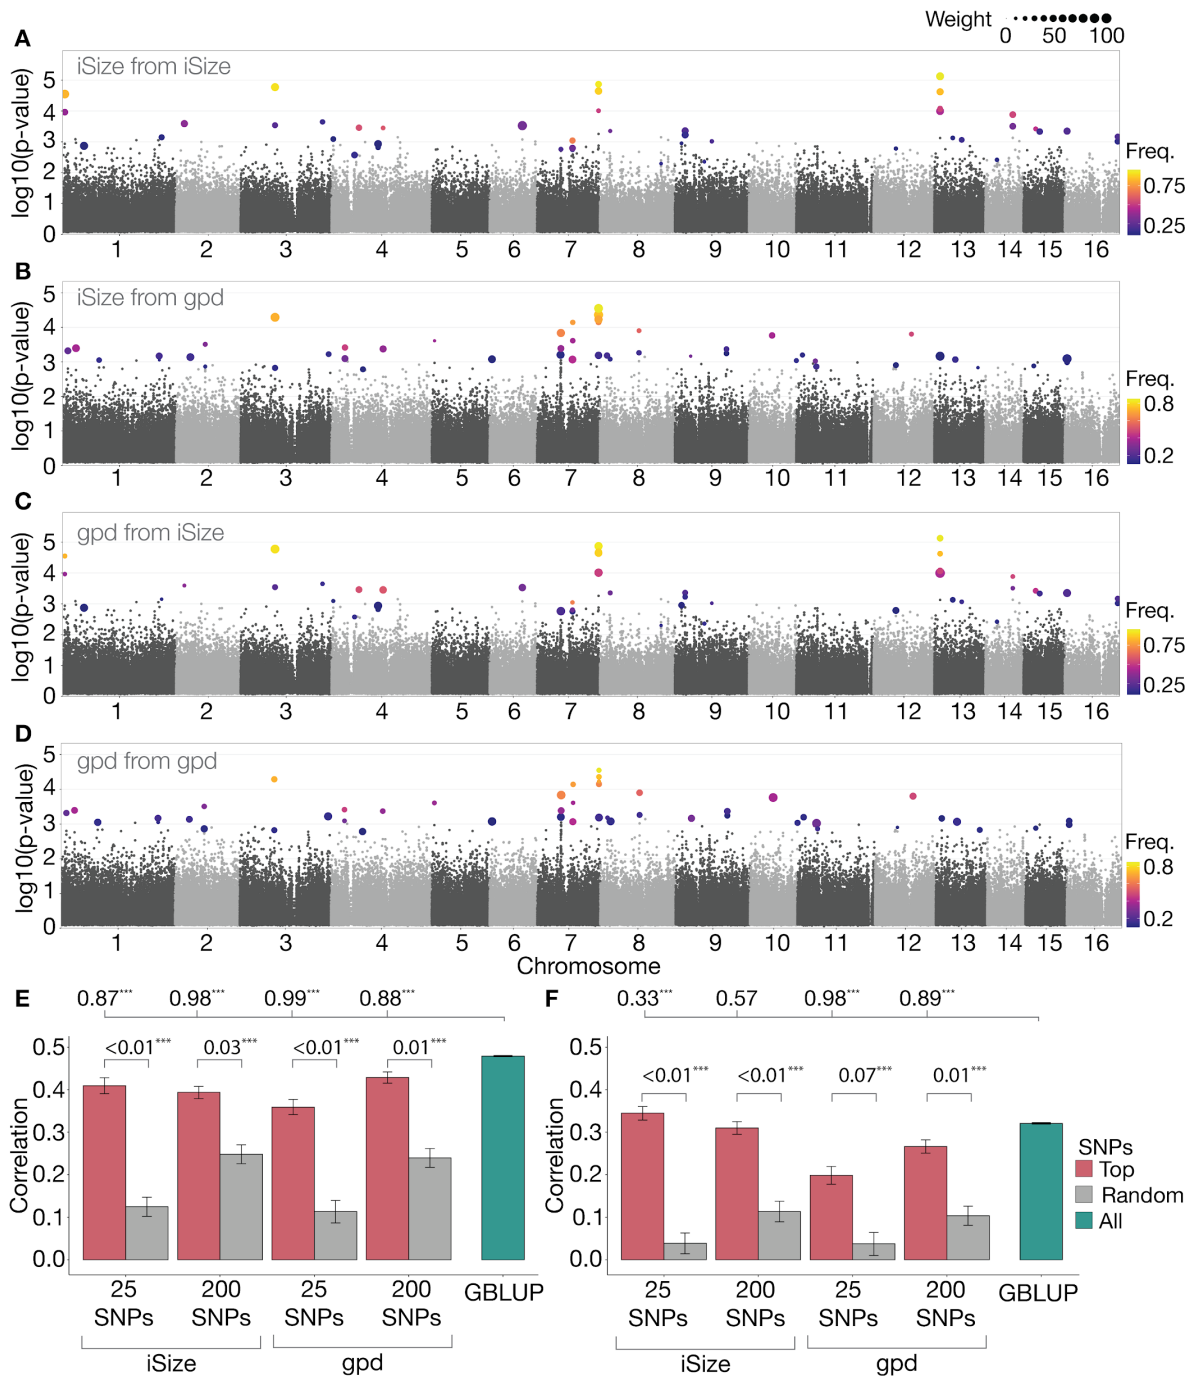

855

856 **Figure 5.** GWAS and genomic prediction using top GWAS markers. **A-D:** Manhattan plots  
 857 coloured by how often a given SNP occurs in the 25 most significant GWAS SNPs and  
 858 scaled by the predictive importance given by the RF algorithm. Frequency of occurrence  
 859 (Freq.) is calculated as a fraction of the 600 times a GWAS was run. Only SNPs with a top 25  
 860 frequency > 0.10 were coloured. **A:** Prediction of iSize based on iSize GWAS. **B:** Prediction  
 861 of iSize based on gpd GWAS. **C:** Prediction of gpd based on iSize GWAS. **D:** Prediction of

862 gpd from gpd GWAS. **E-F**: Correlation between predicted GEBVs and observed phenotypes  
863 when using different methods for prediction of iSize (**E**) or gpd (**F**). The red bars display the  
864 correlation obtained when using the top 25 or 200 most significant SNPs obtained by  
865 performing GWAS using either iSize or gpd. The trait used for GWAS is specified below the  
866  $x$  axis. The blue bars display the correlation obtained using GBLUP on all markers. Grey bars  
867 display the correlation obtained when using 25 or 200 random SNPs as input in the RF  
868 model. Error bars display standard errors obtained when repeating the experiment 100 times  
869 with 100 different divisions into test and training populations. The numbers at the very top of  
870 the plot indicate the fraction of times out of 100 that the given method was outperformed by  
871 the GBLUP method. The asterisks following the fractions indicate whether the model  
872 performed differently from GBLUP according to a paired sample sign test. \*\*\*,  $p < 0.001$ .  
873 The numbers comparing the red and grey bars indicate the fraction of times out of 100 that  
874 the method built on random SNPs outperformed the method built on top GWAS SNPs. The  
875 asterisks following the fractions indicate whether the top SNPs performed differently from  
876 random SNPs according to a paired sample sign test. \*\*\*,  $p < 0.001$ .  
877

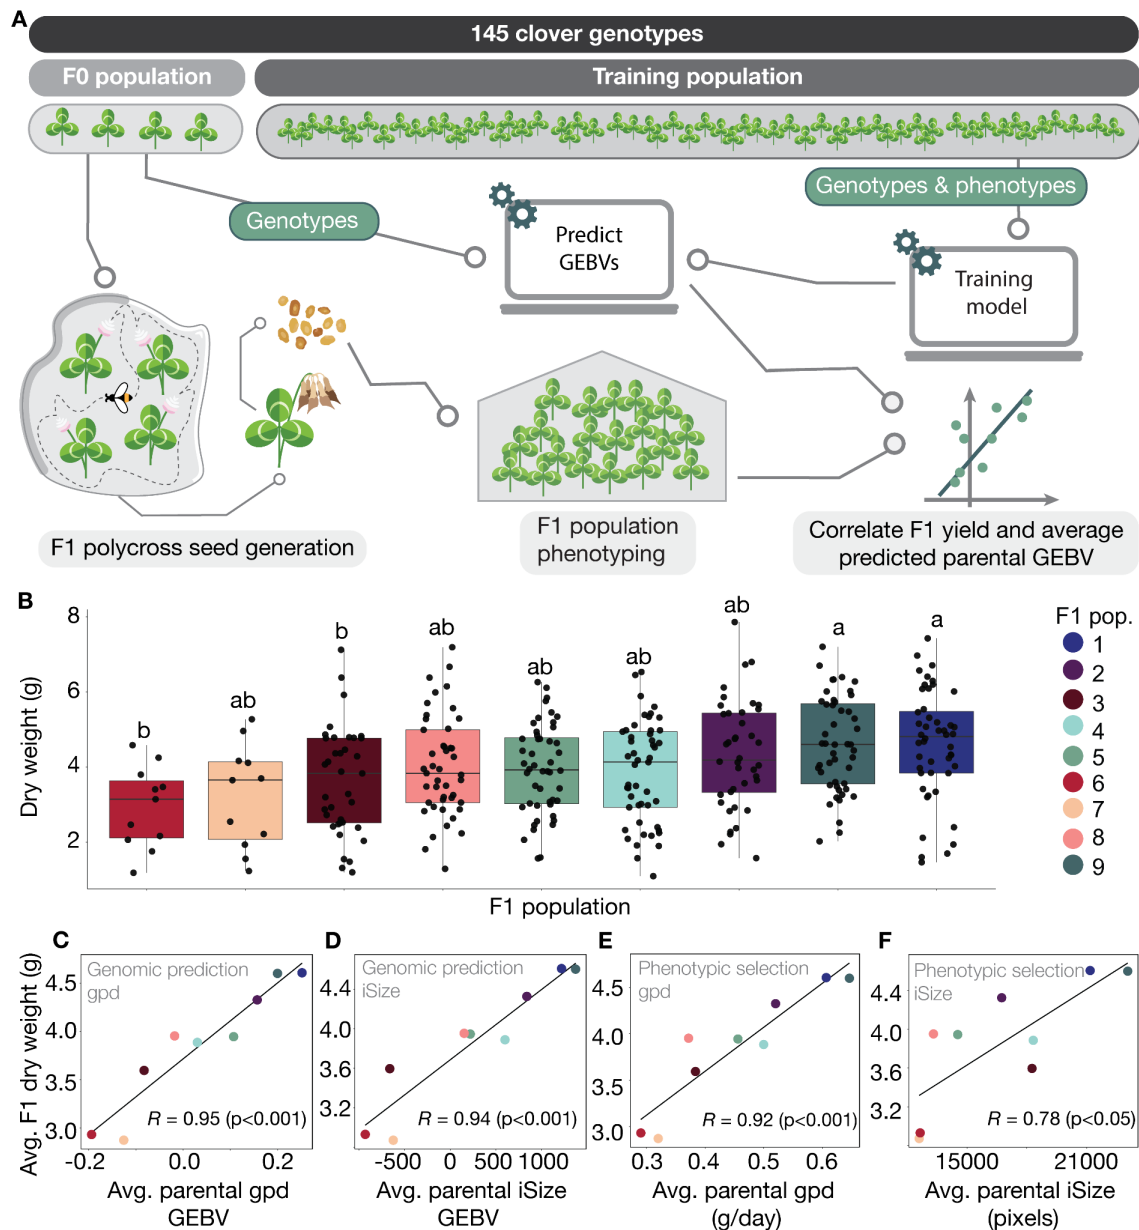

878

879 **Figure 6.** F1 crossing and genomic prediction strategy. **A:** Experimental and prediction

880 setup. **B:** Boxplot for F1 phenotypic data for the 9 polycrosses. F1 population means with

881 different letters differ at  $p < 0.05$  according to Tukey honestly significant difference (HSD).

882 **C-F:** F1 cross generation prediction. **C-D:** Correlation between average F1 population yield

883 and average GEBVs of gpd (**C**) or iSize (**D**). **E-F:** Correlation between average F1

884 population yield and average parental phenotypes of gpd (**E**) or iSize (**F**).

885

886

## 887 **Supplementary tables**

888 **Supplementary table 1.** Estimation of variance components of different yield-related traits.

889 Variance estimates include clover, rhizobium, interaction between clover and rhizobium

890 (Clover x Rhizobium) and residual variance.  $n = 2304$ .

| Trait                  | Variance           |                |                    |                    |
|------------------------|--------------------|----------------|--------------------|--------------------|
|                        | Clover             | Rhizobium      | Clover x Rhizobium | Residual           |
| <b>gpd</b>             |                    |                |                    |                    |
| Estimate               | 1.2E-02            | 4.2E-04        | 3.2E-04            | 2.6E-02            |
| HPDI                   | (8.6E-03, 1.5E-02) | (0.0, 1.2E-03) | (2.0E-05, 7.6E-04) | (2.4E-02, 2.8E-02) |
| Variance explained (%) | <b>30.6</b>        | <b>1.1</b>     | <b>0.8</b>         | <b>67.5</b>        |
| <b>gpdCor</b>          |                    |                |                    |                    |
| Estimate               | 5.4E-03            | 4.8E-04        | 1.8E-04            | 1.5E-02            |
| HPDI                   | (3.9E-03, 6.9E-03) | (0.0, 1.0E-03) | (2.8E-05, 4.3E-04) | (1.4E-02, 1.6E-02) |
| Variance explained (%) | <b>25.3</b>        | <b>2.3</b>     | <b>0.8</b>         | <b>71.6</b>        |
| <b>gpi</b>             |                    |                |                    |                    |
| Estimate               | 4.3E+05            | 1.8E+04        | 1.5                | 1.2E+06            |
| HPDI                   | (4.3E+05, 7.5E+05) | (0.0, 4.7E+04) | (0.6, 2.9)         | (1.1E+06, 1.3E+06) |
| Variance explained (%) | <b>32.4</b>        | <b>1.0</b>     | <b>0.0</b>         | <b>66.6</b>        |
| <b>gpiCor</b>          |                    |                |                    |                    |
| Estimate               | 3.7E+05            | 3.0E+04        | 2.5                | 1.0E+06            |
| HPDI                   | (2.7E+05, 4.8E+05) | (0.0, 6.4E+04) | (0.9, 4.6)         | (9.6E+05, 1.1E+06) |
| Variance explained (%) | <b>26.1</b>        | <b>2.1</b>     | <b>0.0</b>         | <b>71.8</b>        |
| <b>iSize</b>           |                    |                |                    |                    |
| Estimate               | 1.0E+07            | 3.1E+06        | 1.5                | 5.8E+07            |
| HPDI                   | (7.0E+06, 1.4E+07) | (0.0, 5.7E+06) | (0.6, 2.9)         | (5.4E+07, 6.2E+07) |
| Variance explained (%) | <b>14.6</b>        | <b>4.3</b>     | <b>0.0</b>         | <b>81.1</b>        |

891

892 Note: HPDI, 95% Highest Posterior Density Interval.



893

894 **Supplementary table 2. Results from multiple linear regression analyses**

| model                                | <i>p</i> value |              |                 |                 |
|--------------------------------------|----------------|--------------|-----------------|-----------------|
|                                      | iSize<br>GEBVs | gpi<br>GEBVs | gpiCor<br>GEBVs | gpdCor<br>GEBVs |
| gpd = iSize GEBVs + gpi GEBVs + e    | ***            | N.S.         | -               | -               |
| gpd = gpi GEBVs + e                  | -              | **           | -               | -               |
| gpd = iSize GEBVs + gpiCor GEBVs + e | ***            | -            | N.S.            | -               |
| gpd = gpiCor GEBVs + e               | -              | -            | **              | -               |
| gpd = iSize GEBVs + gpdCor GEBVs + e | ***            | -            | -               | N.S.            |
| gpd = gpdCor GEBVs + e               | -              | -            | -               | N.S.            |

895

896 N.S., Not significant; \*,  $p < 0.05$ ; \*\*,  $p < 0.01$ ; \*\*\*,  $p < 0.001$

897 **Supplementary table 3.** GWAS candidate genes. SNP position interval denotes the most  
 898 significant SNPs in the peak coloured in **Figure 5A-D**. %identity refers to the identity with  
 899 the closest *Medicago truncatula* homolog. The annotation column shows the species the gene  
 900 was annotated based on; [Mt]: *Medicago truncatula*, [Tp]: *Trifolium pratense*, [Ca]: *Cicer*  
 901 *arietinum*.  
 902

| Chr. | SNP position              | Gene                                     | Gene position |          | Annotation                                                   | %identity | Phenotypic trait(s) |
|------|---------------------------|------------------------------------------|---------------|----------|--------------------------------------------------------------|-----------|---------------------|
|      |                           |                                          | Start         | End      |                                                              |           |                     |
| 1    | 1910067<br>-<br>1909821   | chr1.jg240.t1                            | 1909818       | 1918815  | small RNA degrading nuclease [Mt]                            | 86.36%    | iSize               |
| 3    | 28987454<br>-<br>28989233 | 51 bp from stop codon:<br>chr3.jg4449.t1 | 28989826      | 28987505 | u6 snRNA-associated-like-Smprotein [Mt]                      | 73.83%    | iSize+gpd           |
| 6    | 27501506                  | chr6.jg4045.t1                           | 27504540      | 27500993 | E3 ubiquitin-protein ligase rhf2a-like protein [Tp]          | 86.89%    | iSize               |
| 7    | 19892133<br>-<br>20181795 | chr7.jg3208.t1                           | 20181419      | 20182720 | extracellular dermal glycoprotein [Mt]                       | 88.45%    | gpd                 |
| 7    | 29979844<br>-<br>30231861 | 342bp from stop codon:<br>chr7.jg4843.t1 | 30236357      | 30232200 | bag family molecular chaperone regulator 4-like protein [Tp] | 80.09%    | gpd                 |
| 7    | 51953440<br>-<br>51953748 | upstream 790bp:<br>chr7.jg8266.t1        | 51958855      | 51955400 | WD repeat-containing protein GTS1 [Ca]                       | 86.89%    | iSize+gpd           |
| 8    | 32983608<br>-<br>32988584 | chr8.jg4570.t1                           | 32989033      | 32984274 | kinetochore protein spc25-like [Tp]                          | 92.41%    | gpd                 |
| 13   | 4876408-<br>4876434       | 66bp from stop codon:<br>chr13.jg754.t1  | 4879246       | 4876474  | transcription factor S-II, central domain protein [Mt]       | 83.47%    | iSize               |

903

904 **Supplementary table 4.** Composition of peat used for the greenhouse experiments.

| <b>Ingredient</b>        | <b>Quantity added per m<sup>3</sup></b> |
|--------------------------|-----------------------------------------|
| Sphagnum                 | 0.8 m <sup>3</sup>                      |
| N-P-K-0-7-22 + micro     | 1.2 kg                                  |
| Superphosphate (crushed) | 0.4 kg                                  |
| Micromax                 | 0.05 kg                                 |
| Calcium                  | 2.4 kg                                  |
| Perlite type 3 (2-6 mm)  | 200 l                                   |
| BARA clay (2-6 mm)       | 60 kg                                   |
| NO <sub>3</sub> -N       | 0.00 g                                  |
| K                        | 268.80 g                                |
| Mo                       | 3.27 g                                  |
| Zn                       | 1.10 g                                  |
| NH <sub>4</sub> -N       | 0.00 g                                  |
| Mg                       | 59.10 g                                 |
| Cu                       | 2.42 g                                  |
| Fe                       | 8.94 g                                  |
| P                        | 117.60 g                                |
| B                        | 0.58 g                                  |
| Mn                       | 3.77 g                                  |
| S                        | 59.00 g                                 |

905

906 **Supplementary table 5.** Overview of F1 populations with information about their average dry  
 907 weights, number of established plants, parents used to generate the polycrosses and their  
 908 average iSize, gpd, GEBV.

| Cross | Parents                                                    | avg. parental |          |           |            | avg.dry weight (g) | N plants |
|-------|------------------------------------------------------------|---------------|----------|-----------|------------|--------------------|----------|
|       |                                                            | gpd           | iSize    | gpd GEBV  | iSize GEBV |                    |          |
| 1     | Aoost_01, Aoost_08, Aoost_09, Banna_02, Banna_03, Banna_07 | 6.06E-01      | 2.12E+04 | 2.52E-02  | 1.22E+03   | 4.61               | 48       |
| 2     | Aoost_02, Ilona_09, Llanc_09, Sster_01                     | 5.20E-01      | 1.67E+04 | 1.57E-02  | 8.38E+02   | 4.33               | 40       |
| 3     | Ilona_05, Kdike_09, Llanc_09, Aalon_03                     | 3.83E-01      | 1.83E+04 | -8.25E-03 | -6.63E+02  | 3.60               | 38       |
| 4     | Ancor_10, Borek_06, Ctain_09, Rbani_02                     | 5.00E-01      | 1.83E+04 | 3.02E-03  | 6.00E+02   | 3.89               | 48       |
| 5     | Ancor_04, Aoost_10, Clfin_08, Kdike_08                     | 4.56E-01      | 1.45E+04 | 1.07E-02  | 2.19E+02   | 3.95               | 48       |
| 6     | Aearl_08, Ccyma_03, Llanc_06, Aaran_08                     | 2.90E-01      | 1.26E+04 | -1.94E-02 | -9.31E+02  | 2.93               | 11       |
| 7     | Aearl_05, Clfin_02, Ctain_05, Mrida_04                     | 3.20E-01      | 1.26E+04 | -1.26E-02 | -6.24E+02  | 2.87               | 13       |
| 8     | Clfin_03, Ctain_05, Volin_01, Aaran_04                     | 3.72E-01      | 1.33E+04 | -1.80E-03 | 1.53E+02   | 3.95               | 46       |
| 9     | Aoost_01, Aoost_08, Banna_02, Rbani_02, Sster_01, Sster_06 | 6.46E-01      | 2.31E+04 | 2.00E-02  | 1.37E+03   | 4.60               | 48       |

909

## 910 Supplementary Figures

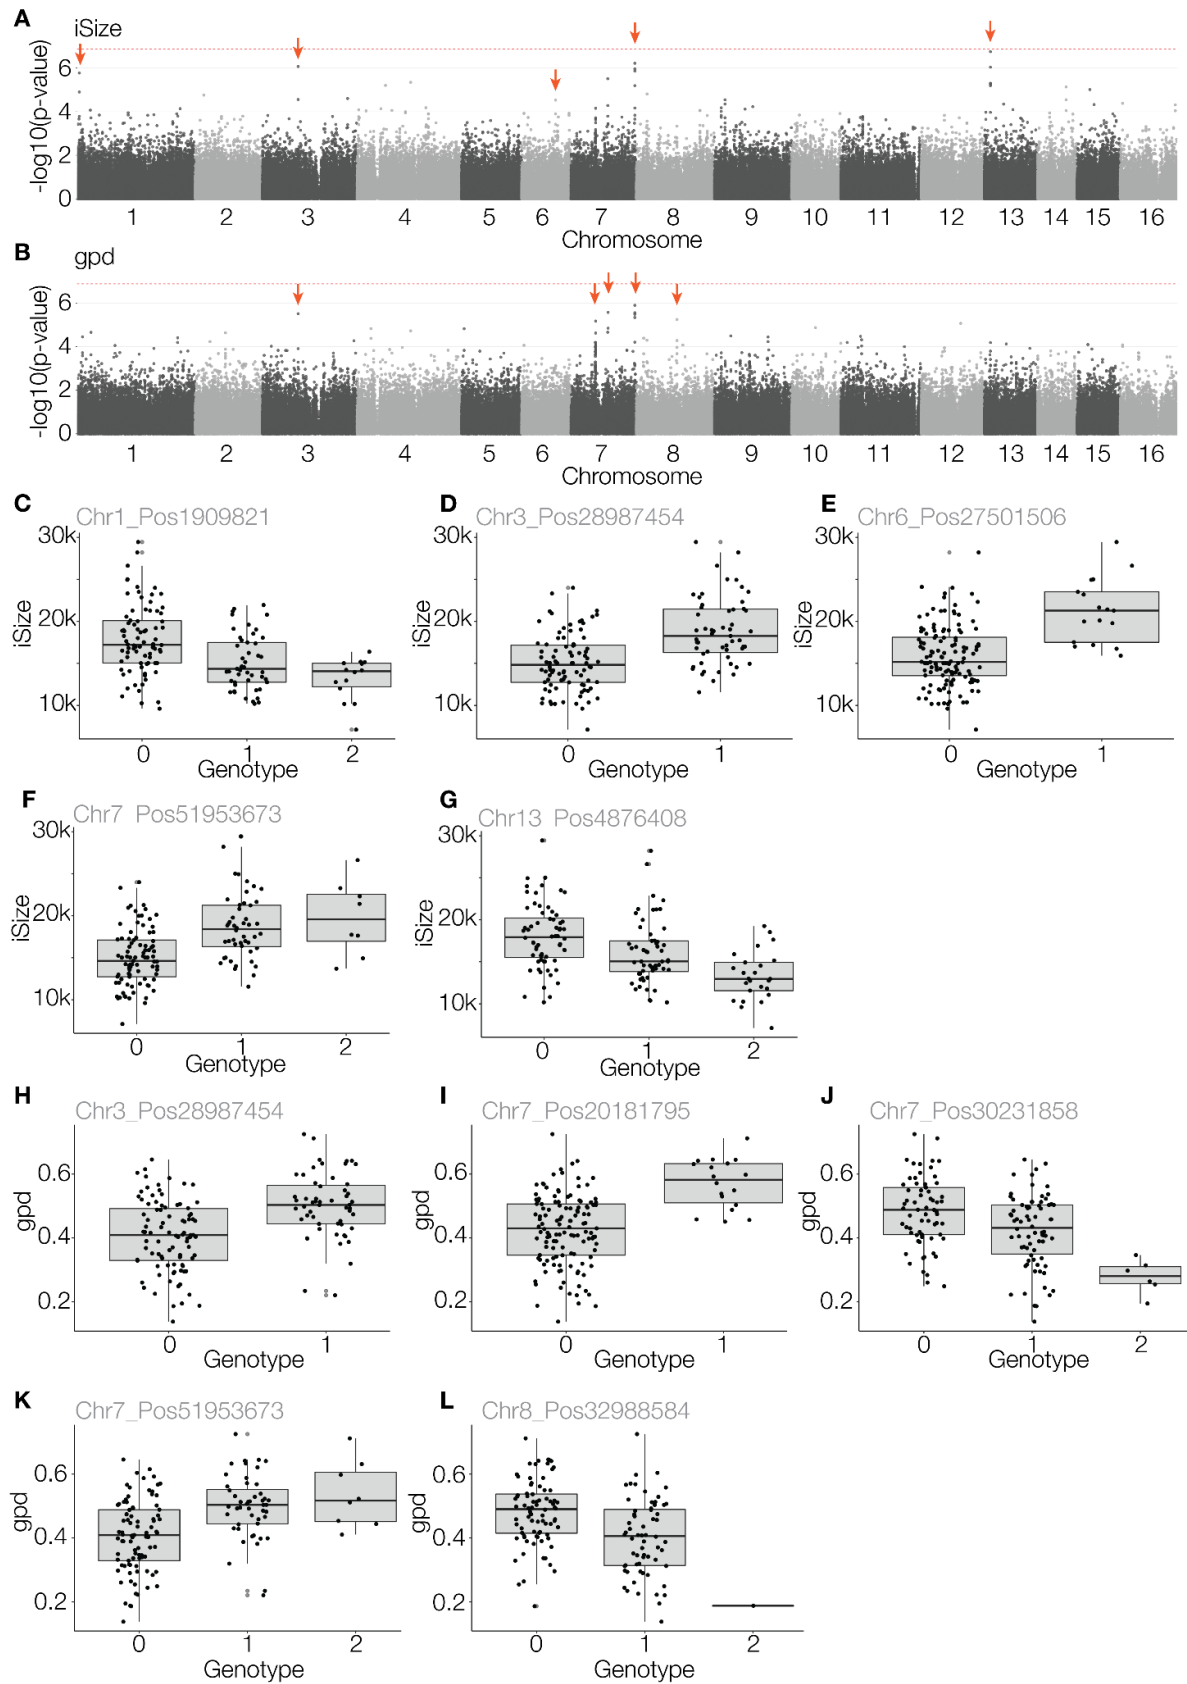

911

912 **Supplementary figure 1. A-B:** Manhattan plots showing results of GWAS of **A:** iSize or **B:**  
913 gpd ( $n = 145$ ). The genetic model is set to diploid. The red dotted line indicates the  
914 Bonferroni threshold at 6.9. Effect plots for the most significant SNP for each peak indicated  
915 with an orange arrow is shown in **C-L**. **C-G:** Effect plots for the most significant SNP in each  
916 peak for iSize. **H-L:** Effect plots for the most significant SNP in each peak for gpd.

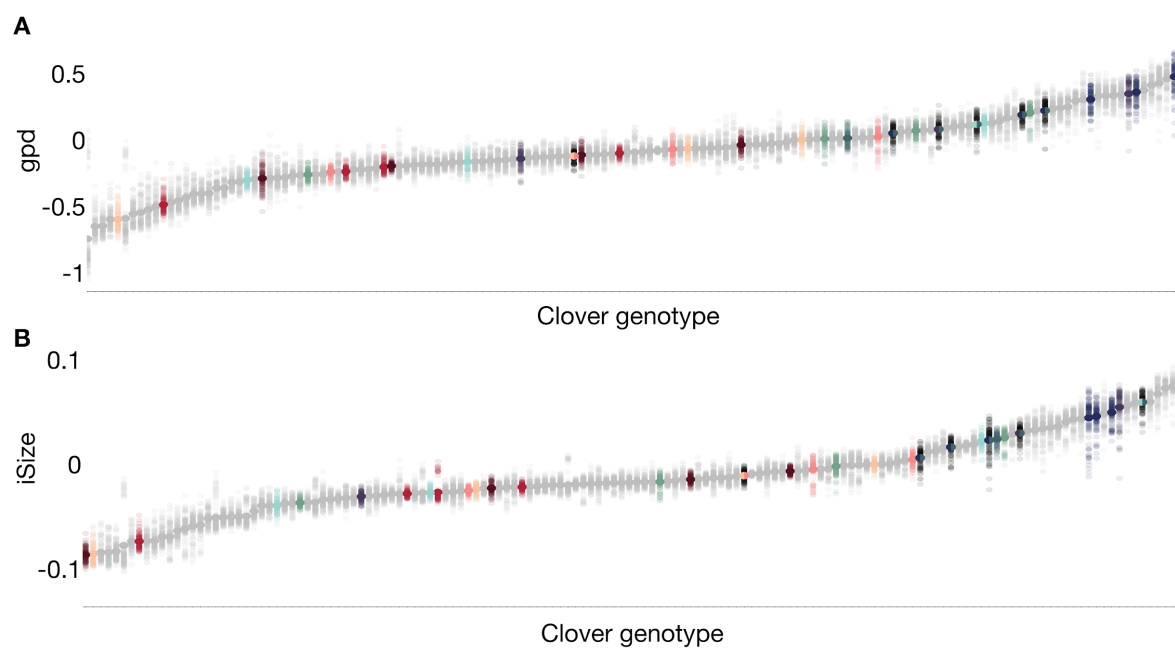

917

918 **Supplementary figure 2.** F1 parental distribution of GEBVs of gpd (A) or iSize (B). Colors

919 refer to Figure 6.

920

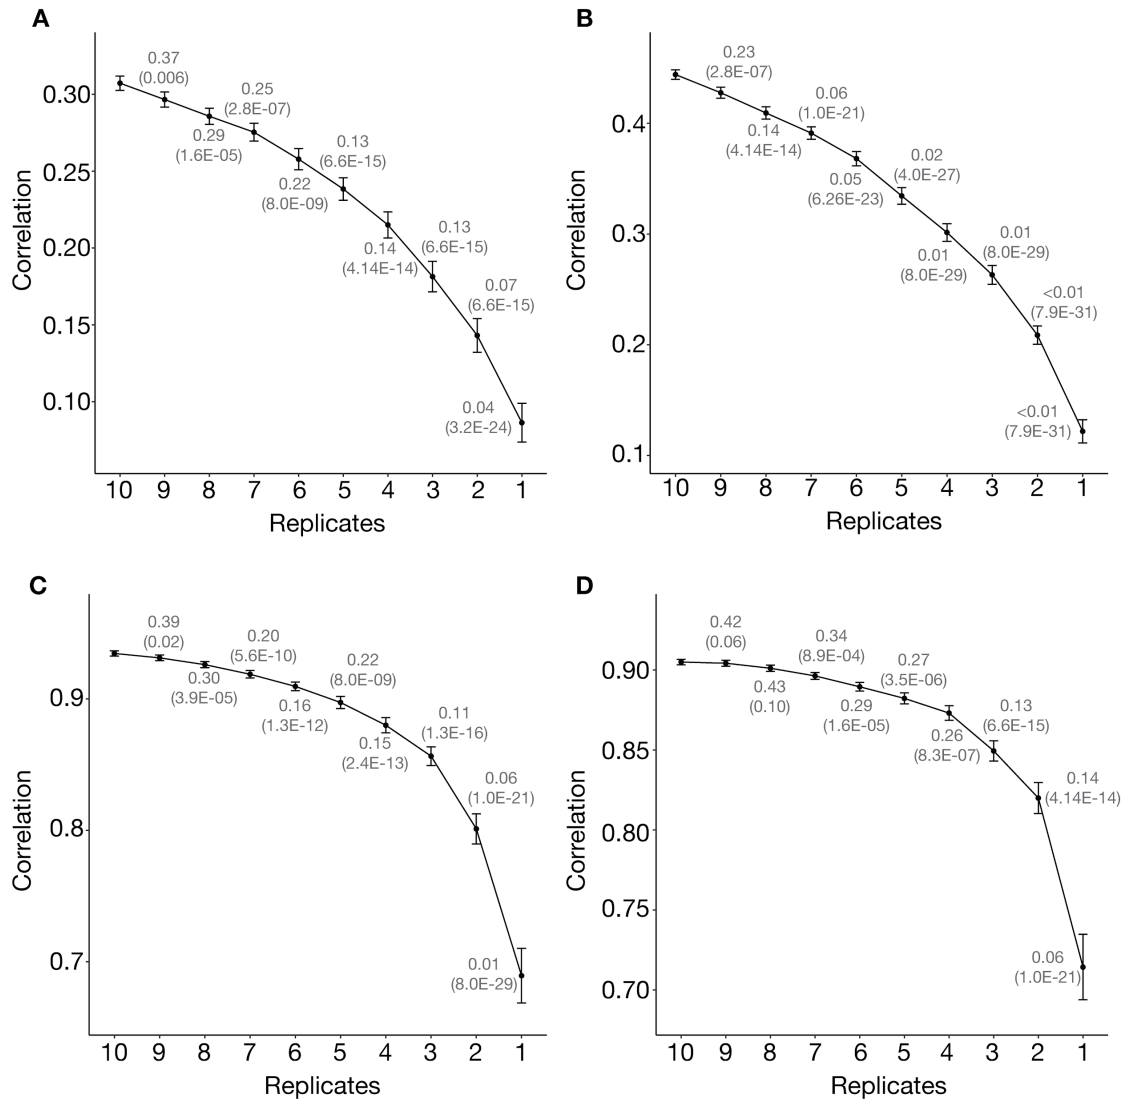

921

922 **Supplementary figure 3.** Replicate reduction. Correlation between GEBVs and phenotypes  
 923 for the dataset using only clover genotypes with at least 10 replicates. Error bars display  
 924 standard errors. The fractions above the data points refer to the frequency that using the  
 925 indicated number of replicates performed better than using 10 replicates for prediction. The  
 926 numbers in parentheses indicate the *p* value that the indicated number of replicates led to a  
 927 prediction performance equal to that of using 10 replicates (paired sample sign test). **A-B:** F0  
 928 prediction of gpd using (A) gpd and (B) iSize. **C-D:** F1 prediction of gpd using (C) gpd and  
 929 (D) iSize



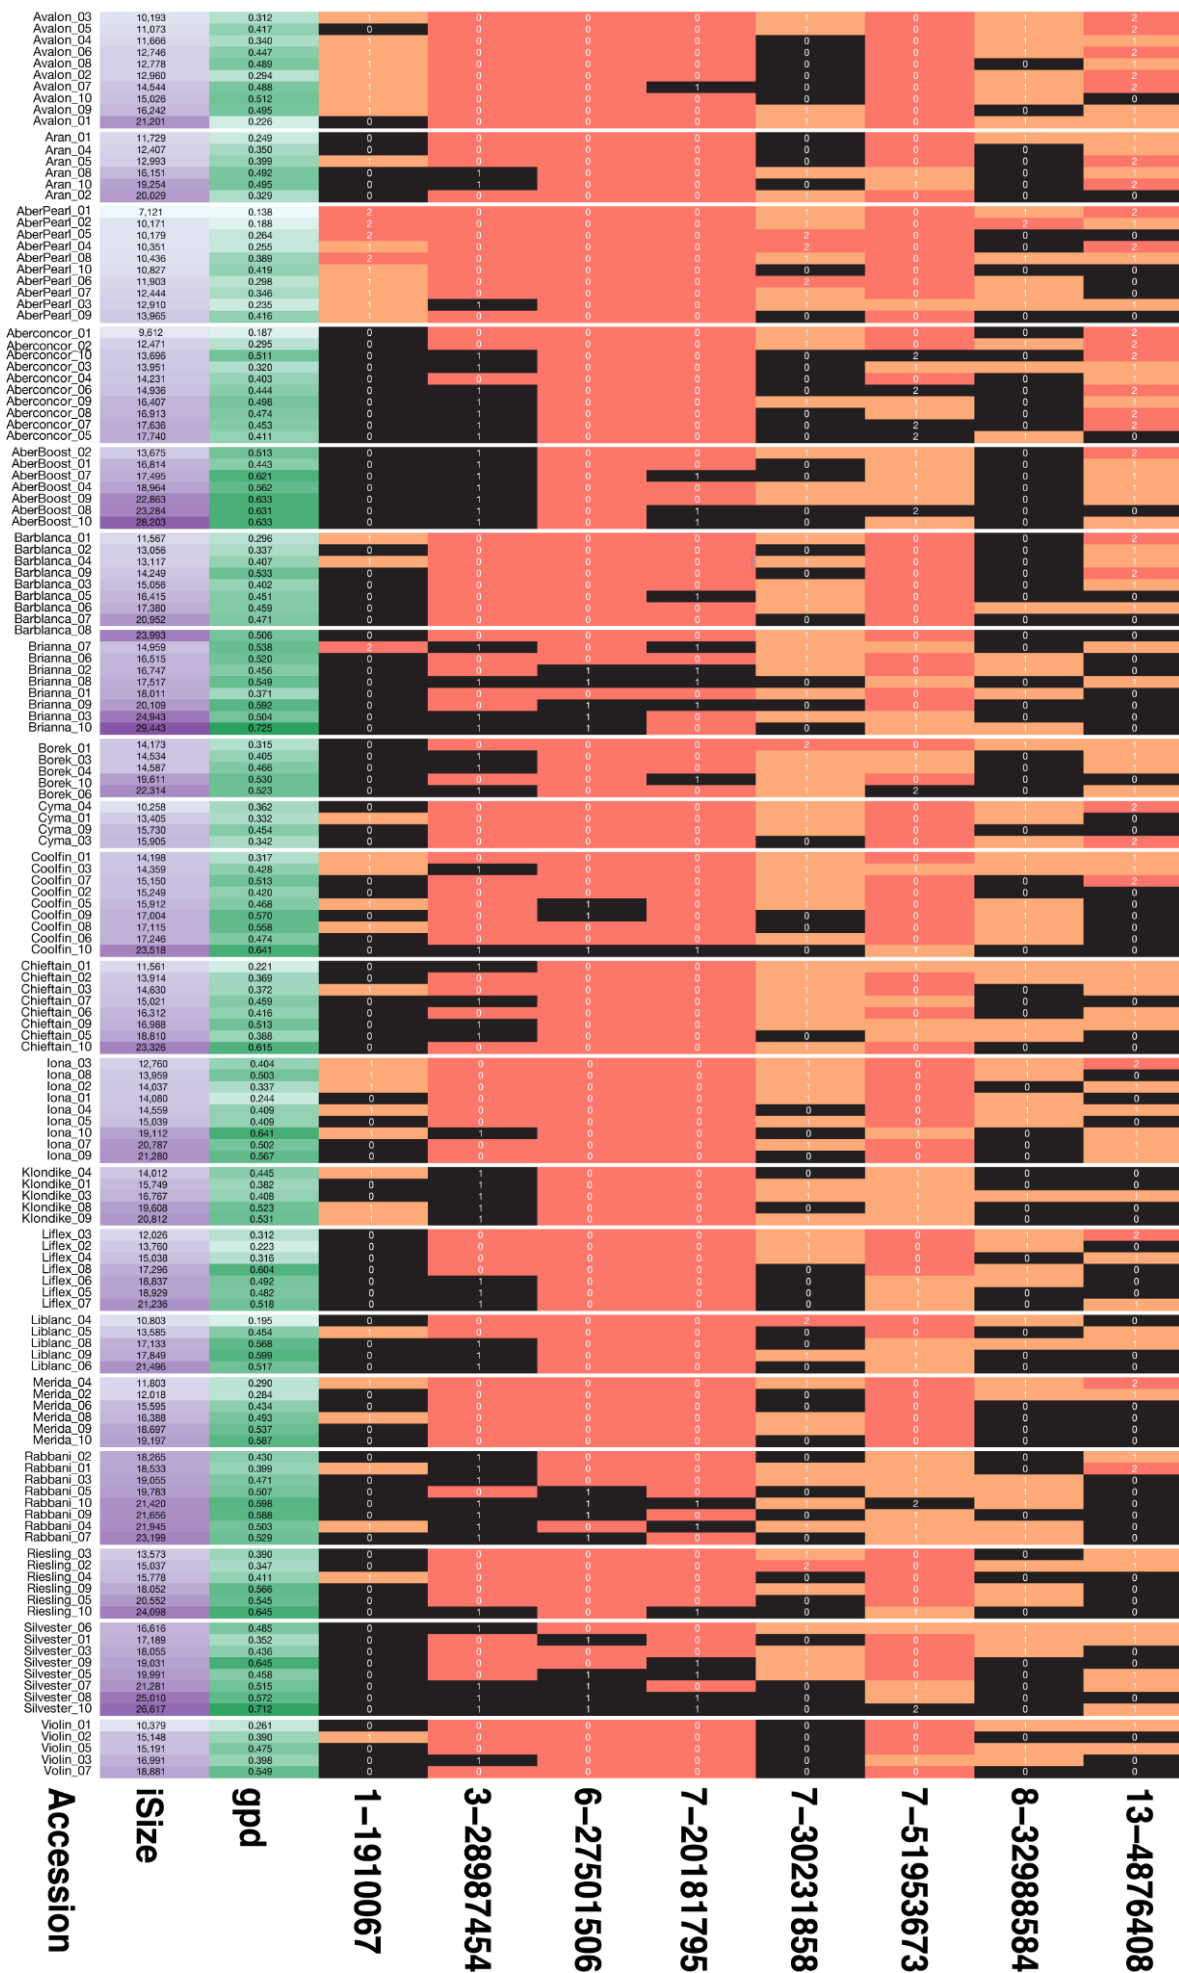

931 **Supplementary figure 4.** Variation in QTL genotypes (0, homozygous reference; 1,  
932 heterozygote; 2, homozygous alternative. Each line reports the genotype, average iSize, gpd  
933 and the clover genotype. Genotypes are coloured by their effect on iSize. Black blocks  
934 indicate the allele with the largest median iSize, red blocks indicate the allele with the lowest  
935 median iSize, orange blocks indicate heterozygosity. Accessions are grouped into blocks  
936 row-wise according to variety and sorted within variety according to iSize.

937

938

## 939 **Supplementary files**

940 **Supplementary file 1:** Raw growth data

941

942 **Supplementary file 2:** Observations of single plants data

943

944 **Supplementary file 3:** Average phenotypes and GEBVs

945

946 **Supplementary file 4:** Imputed genotype file

947

948 **Supplementary file 5:** GWAS results, top 200 most significant SNPs

949

950 **Supplementary file 6:** Dry weight of F1 plants
